# Supplementary material
Source: PubMed Central journal article supplement (PMC5653285)
Supplement: NIHMS882461-supplement.pdf [file NIHMS882461-supplement.pdf]

Figure S1

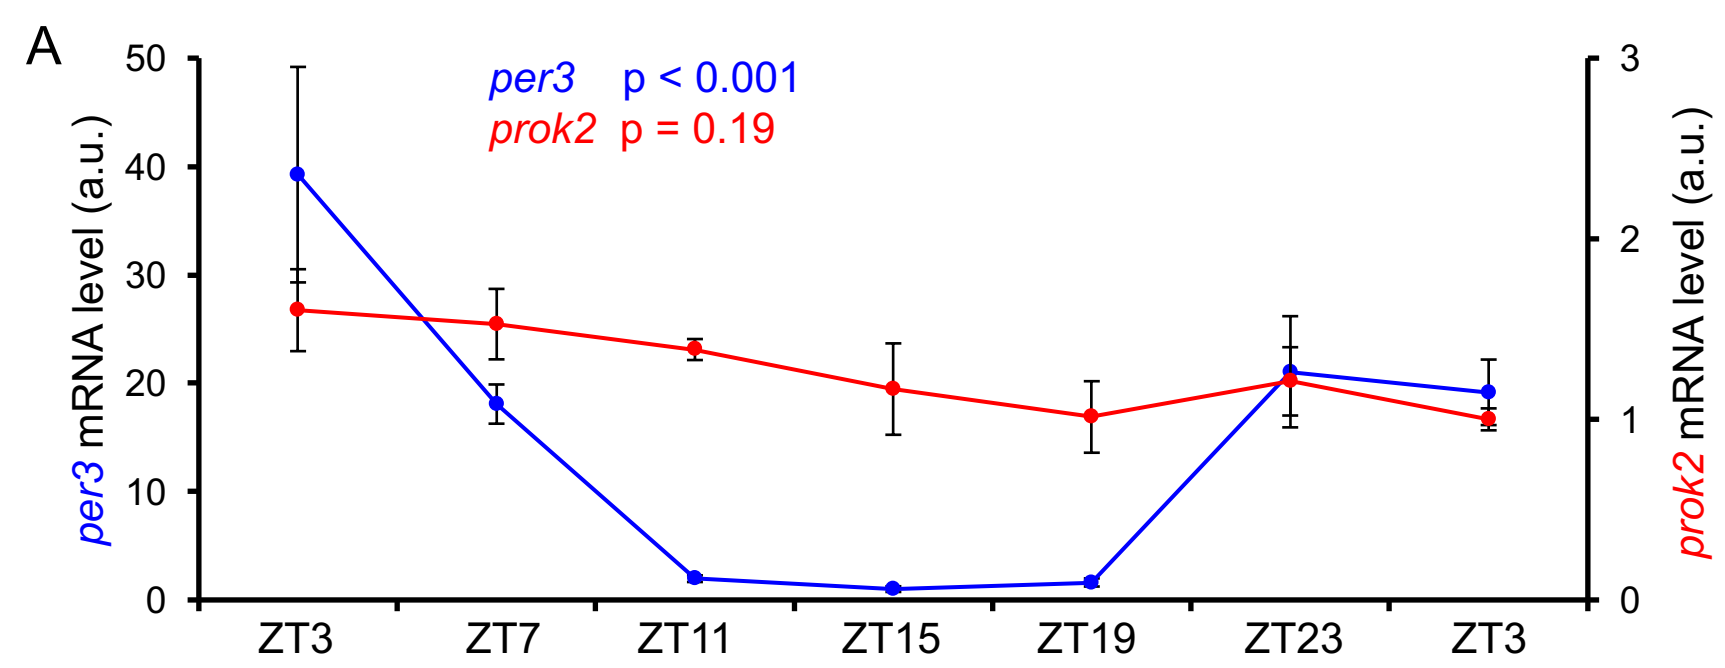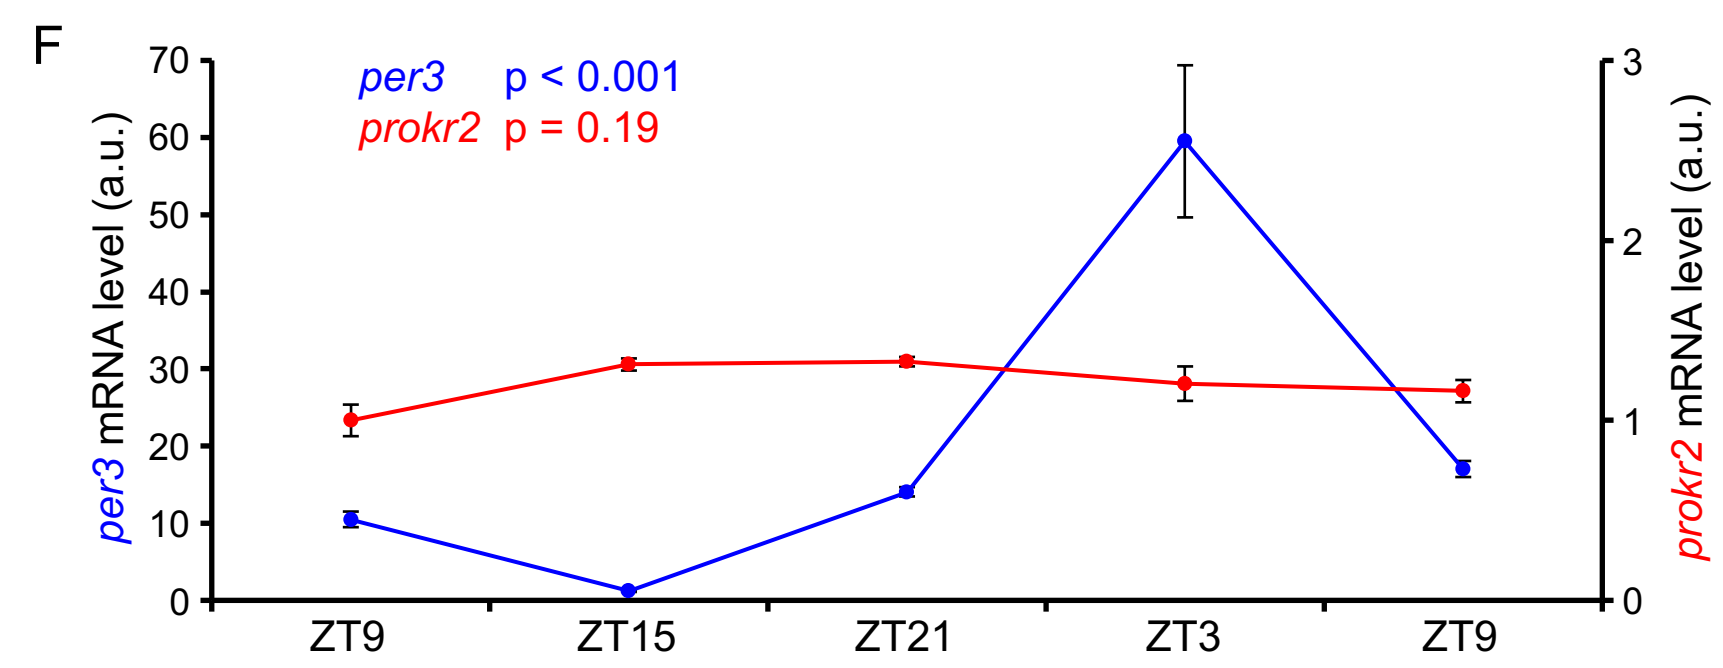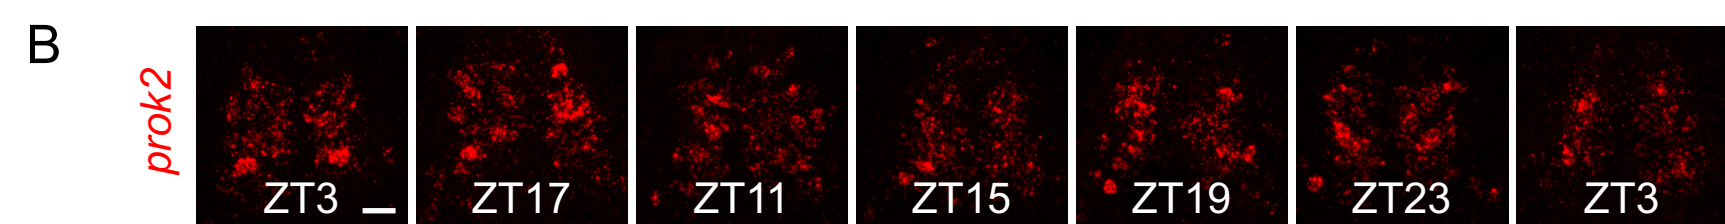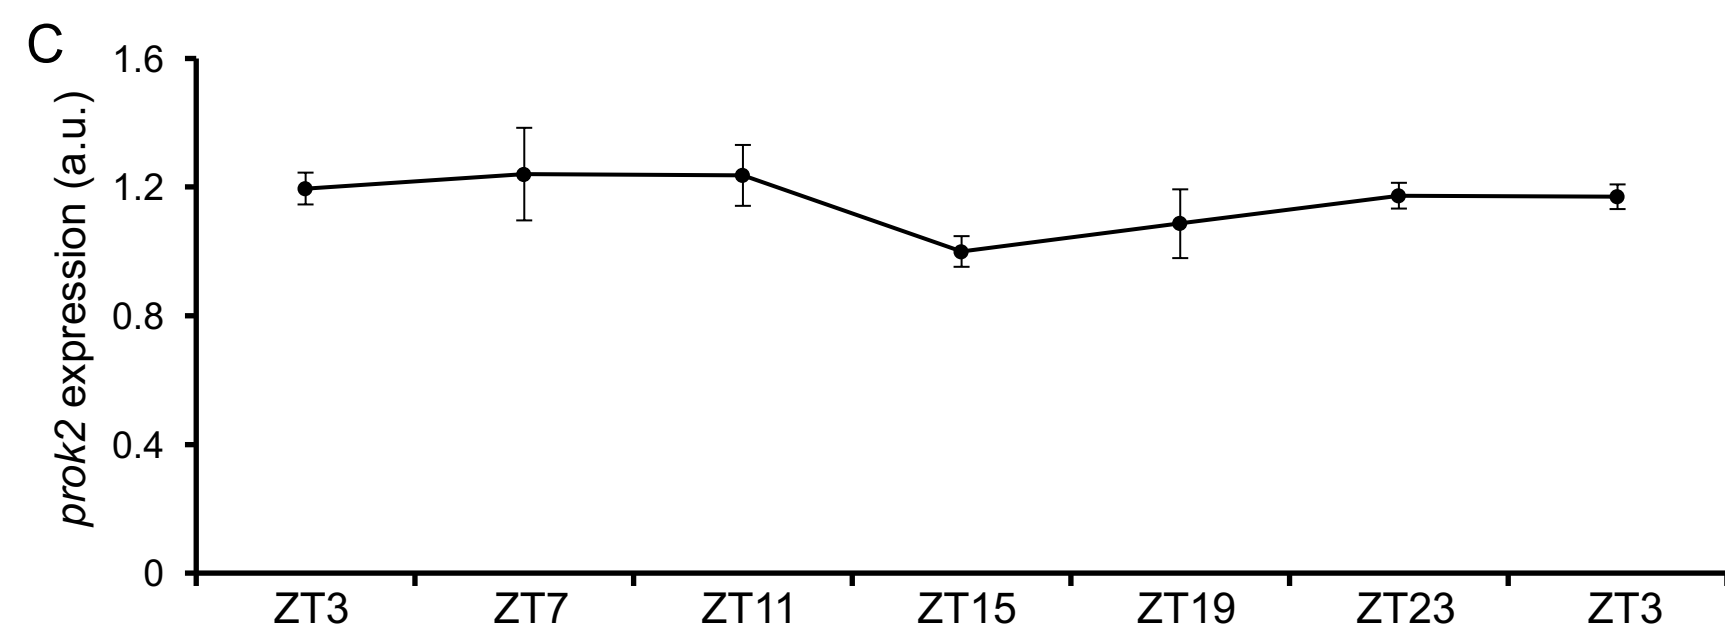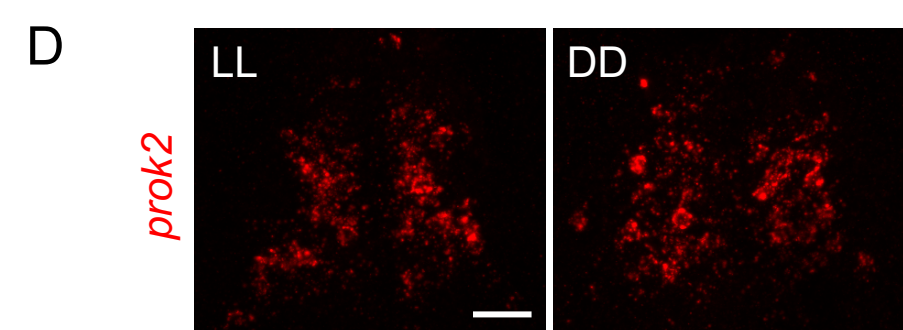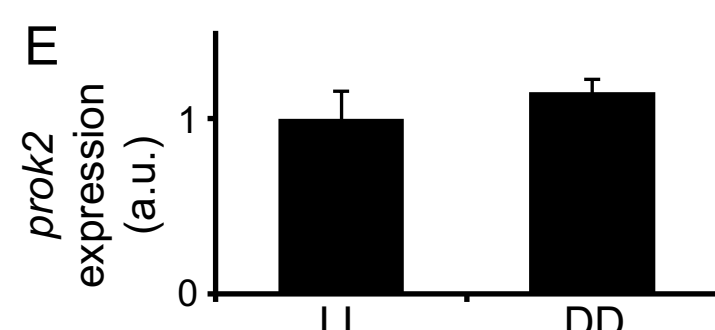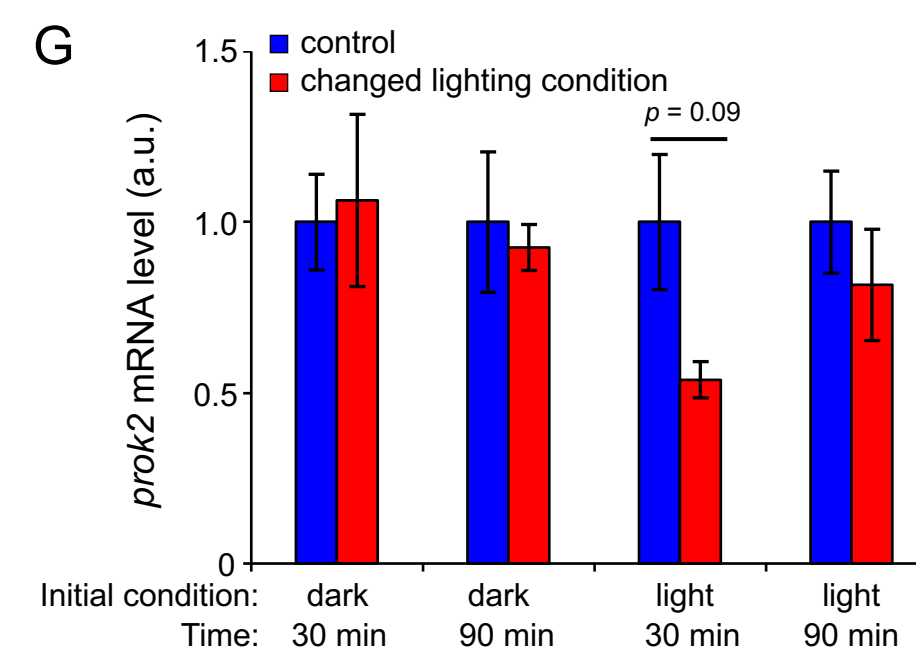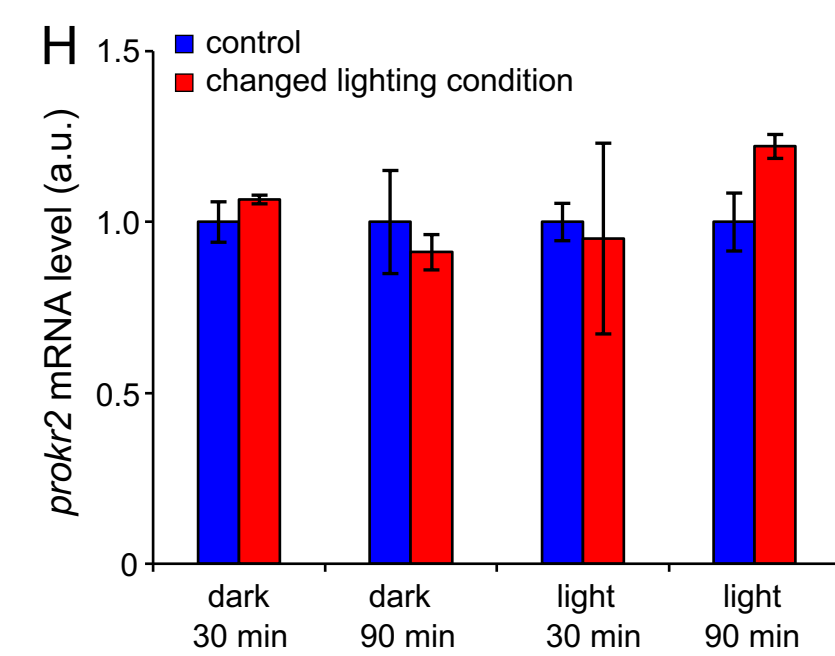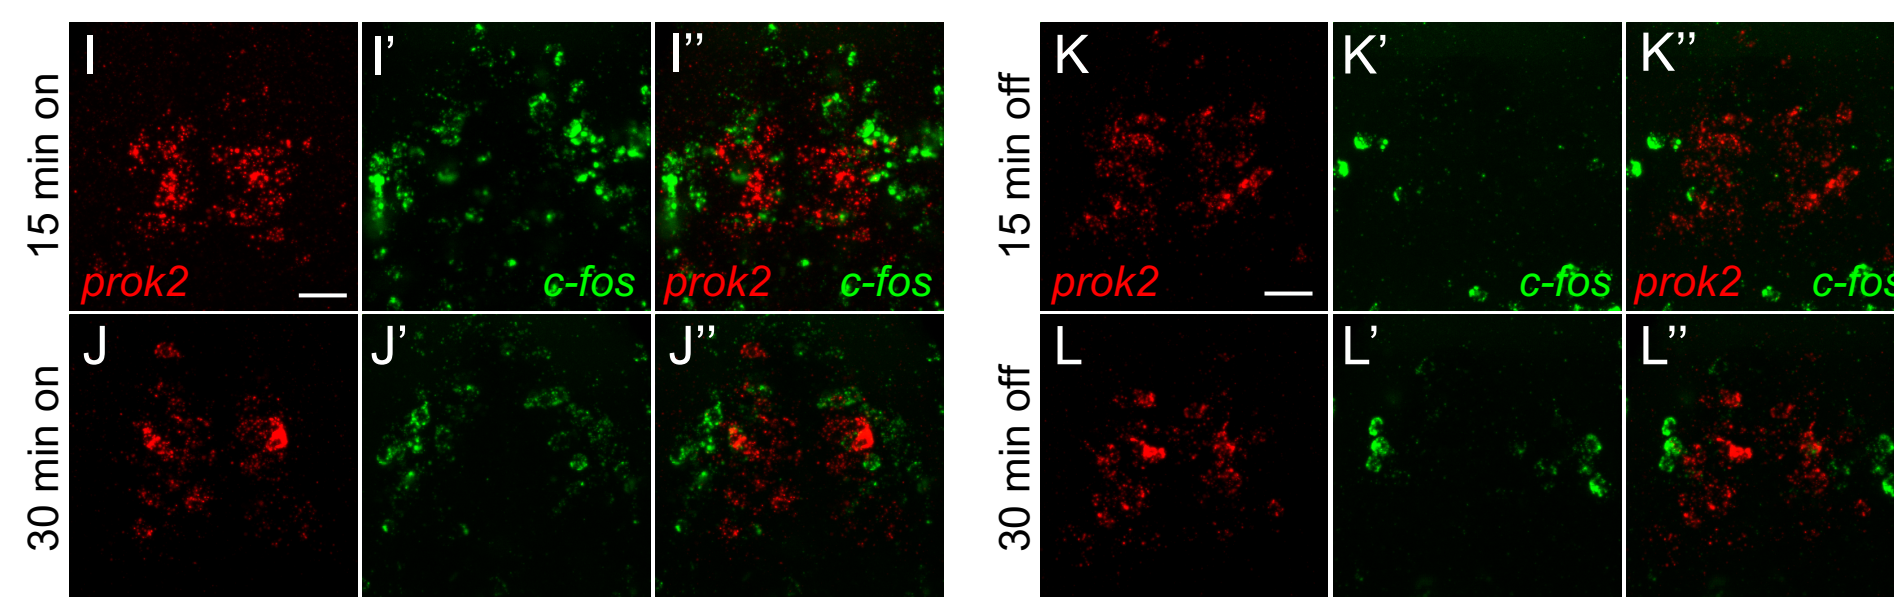



Figure S2

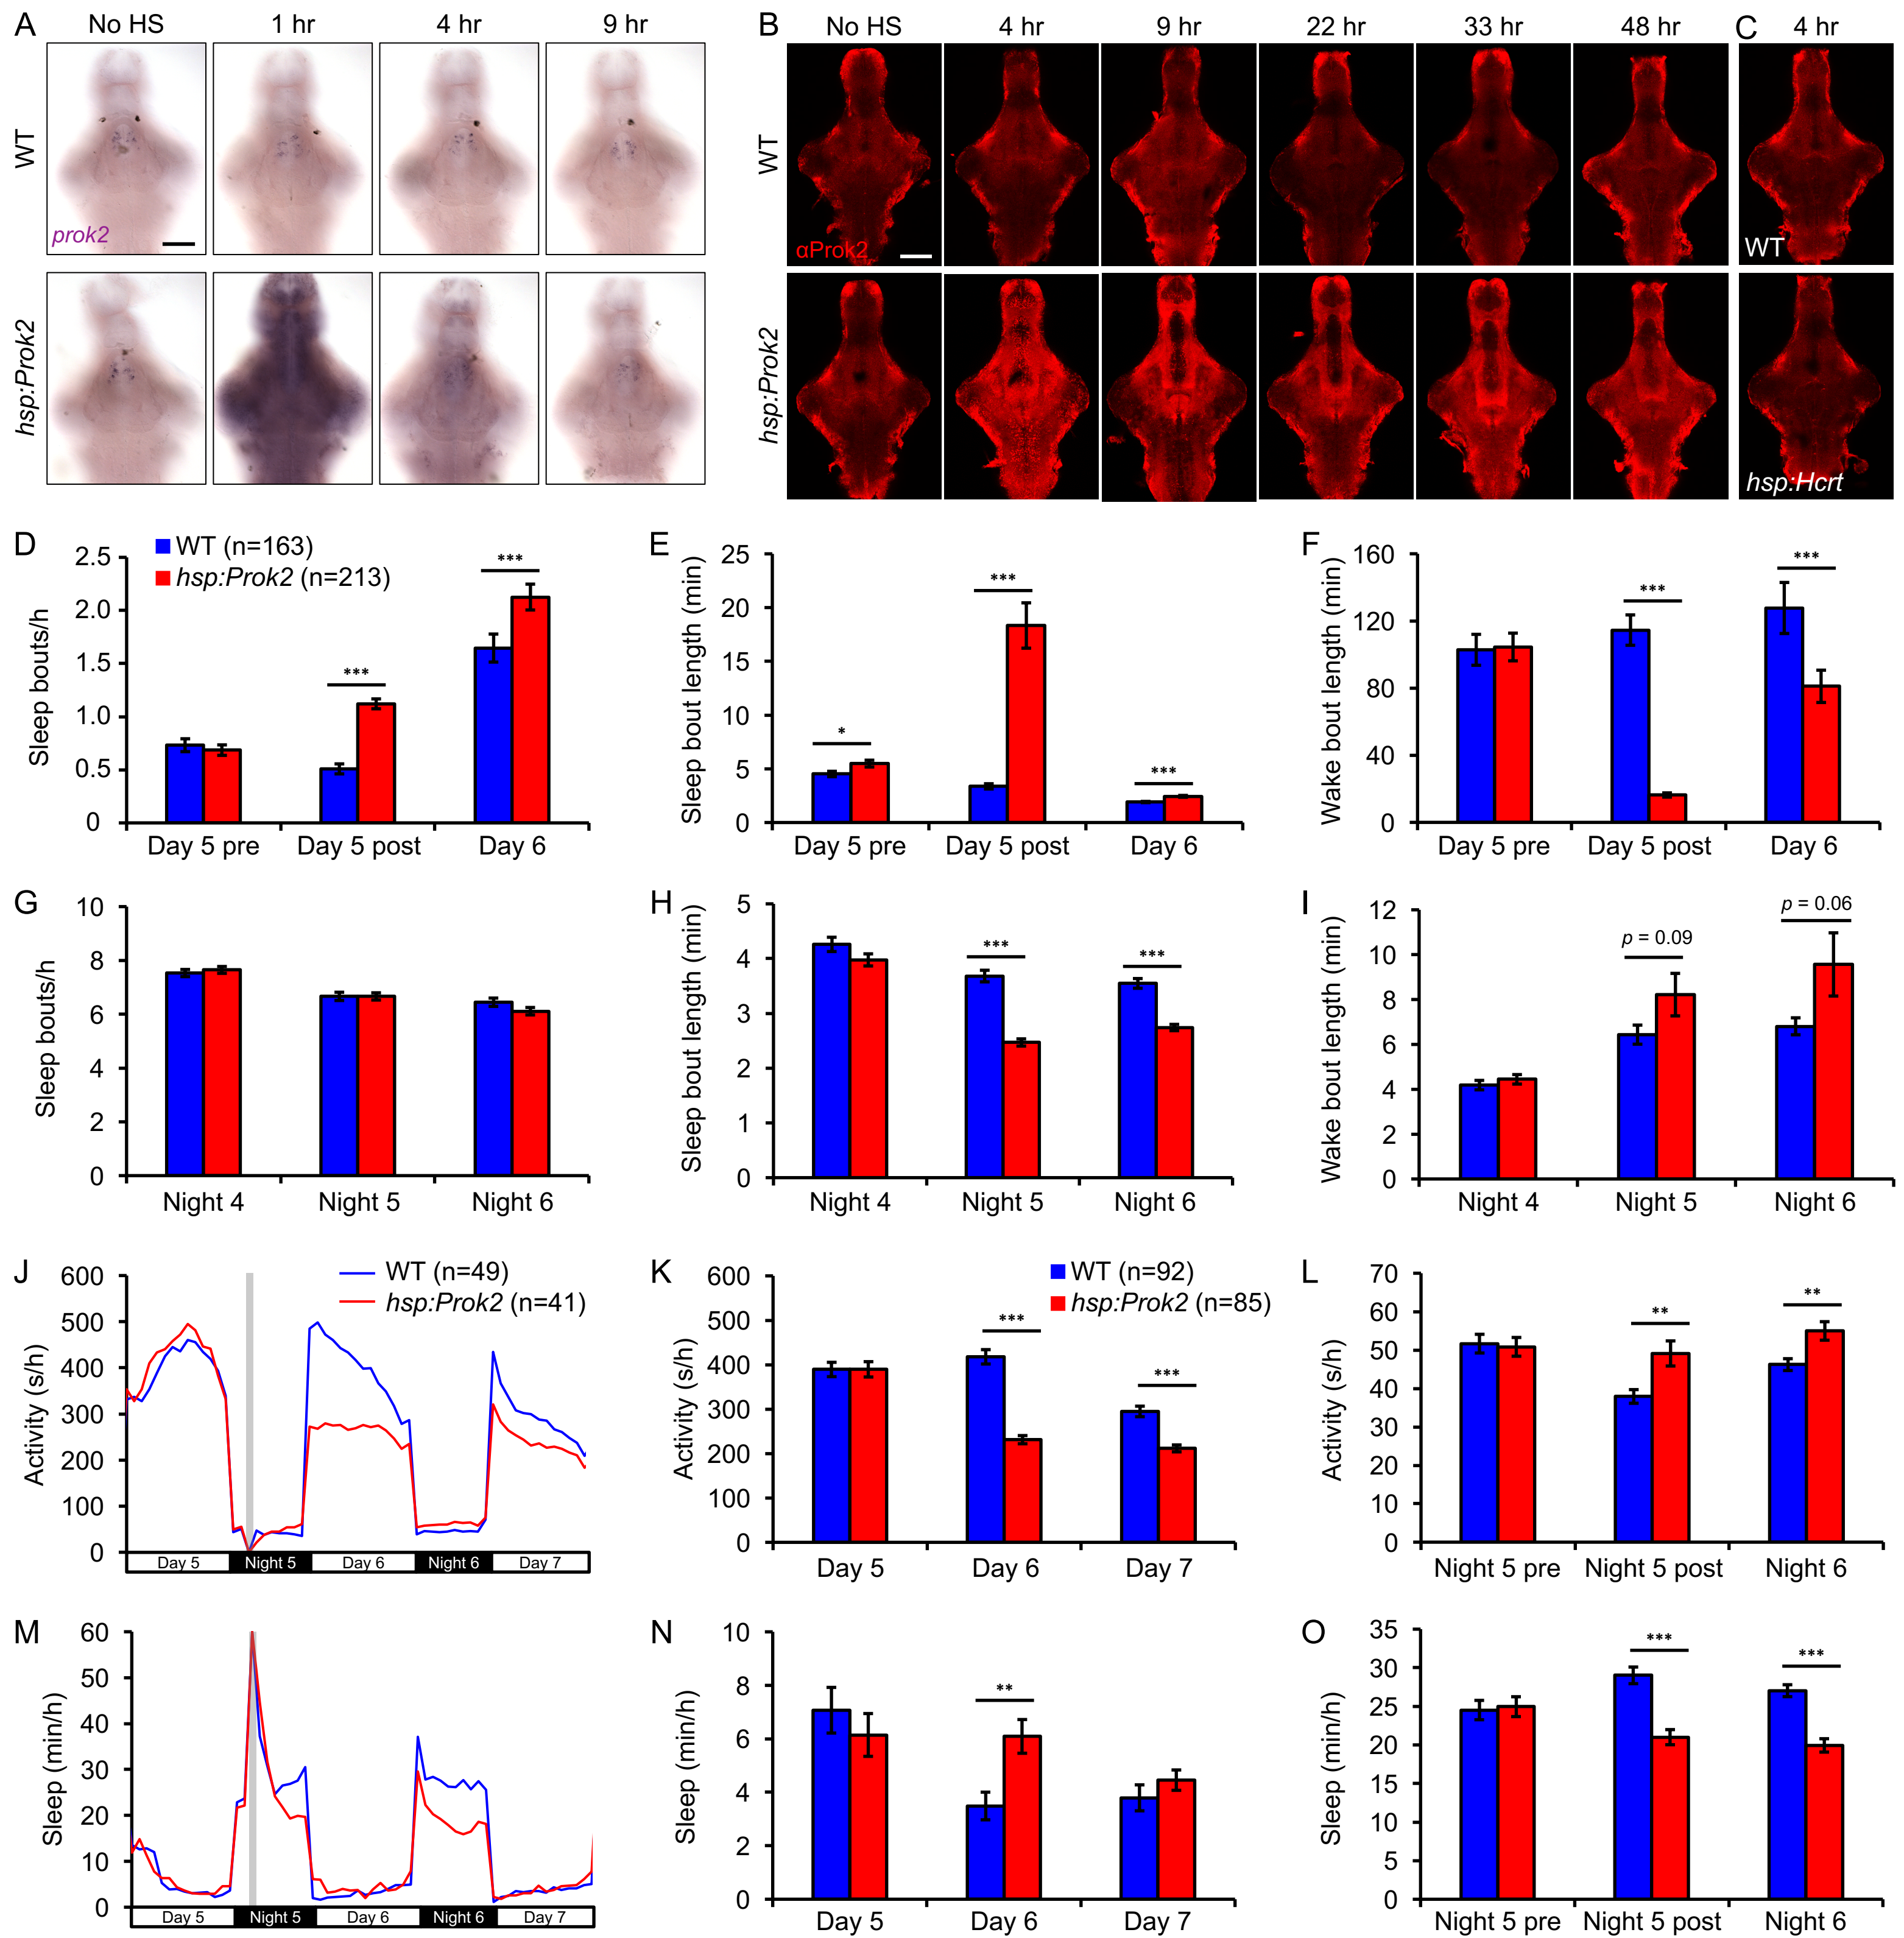



Figure S3

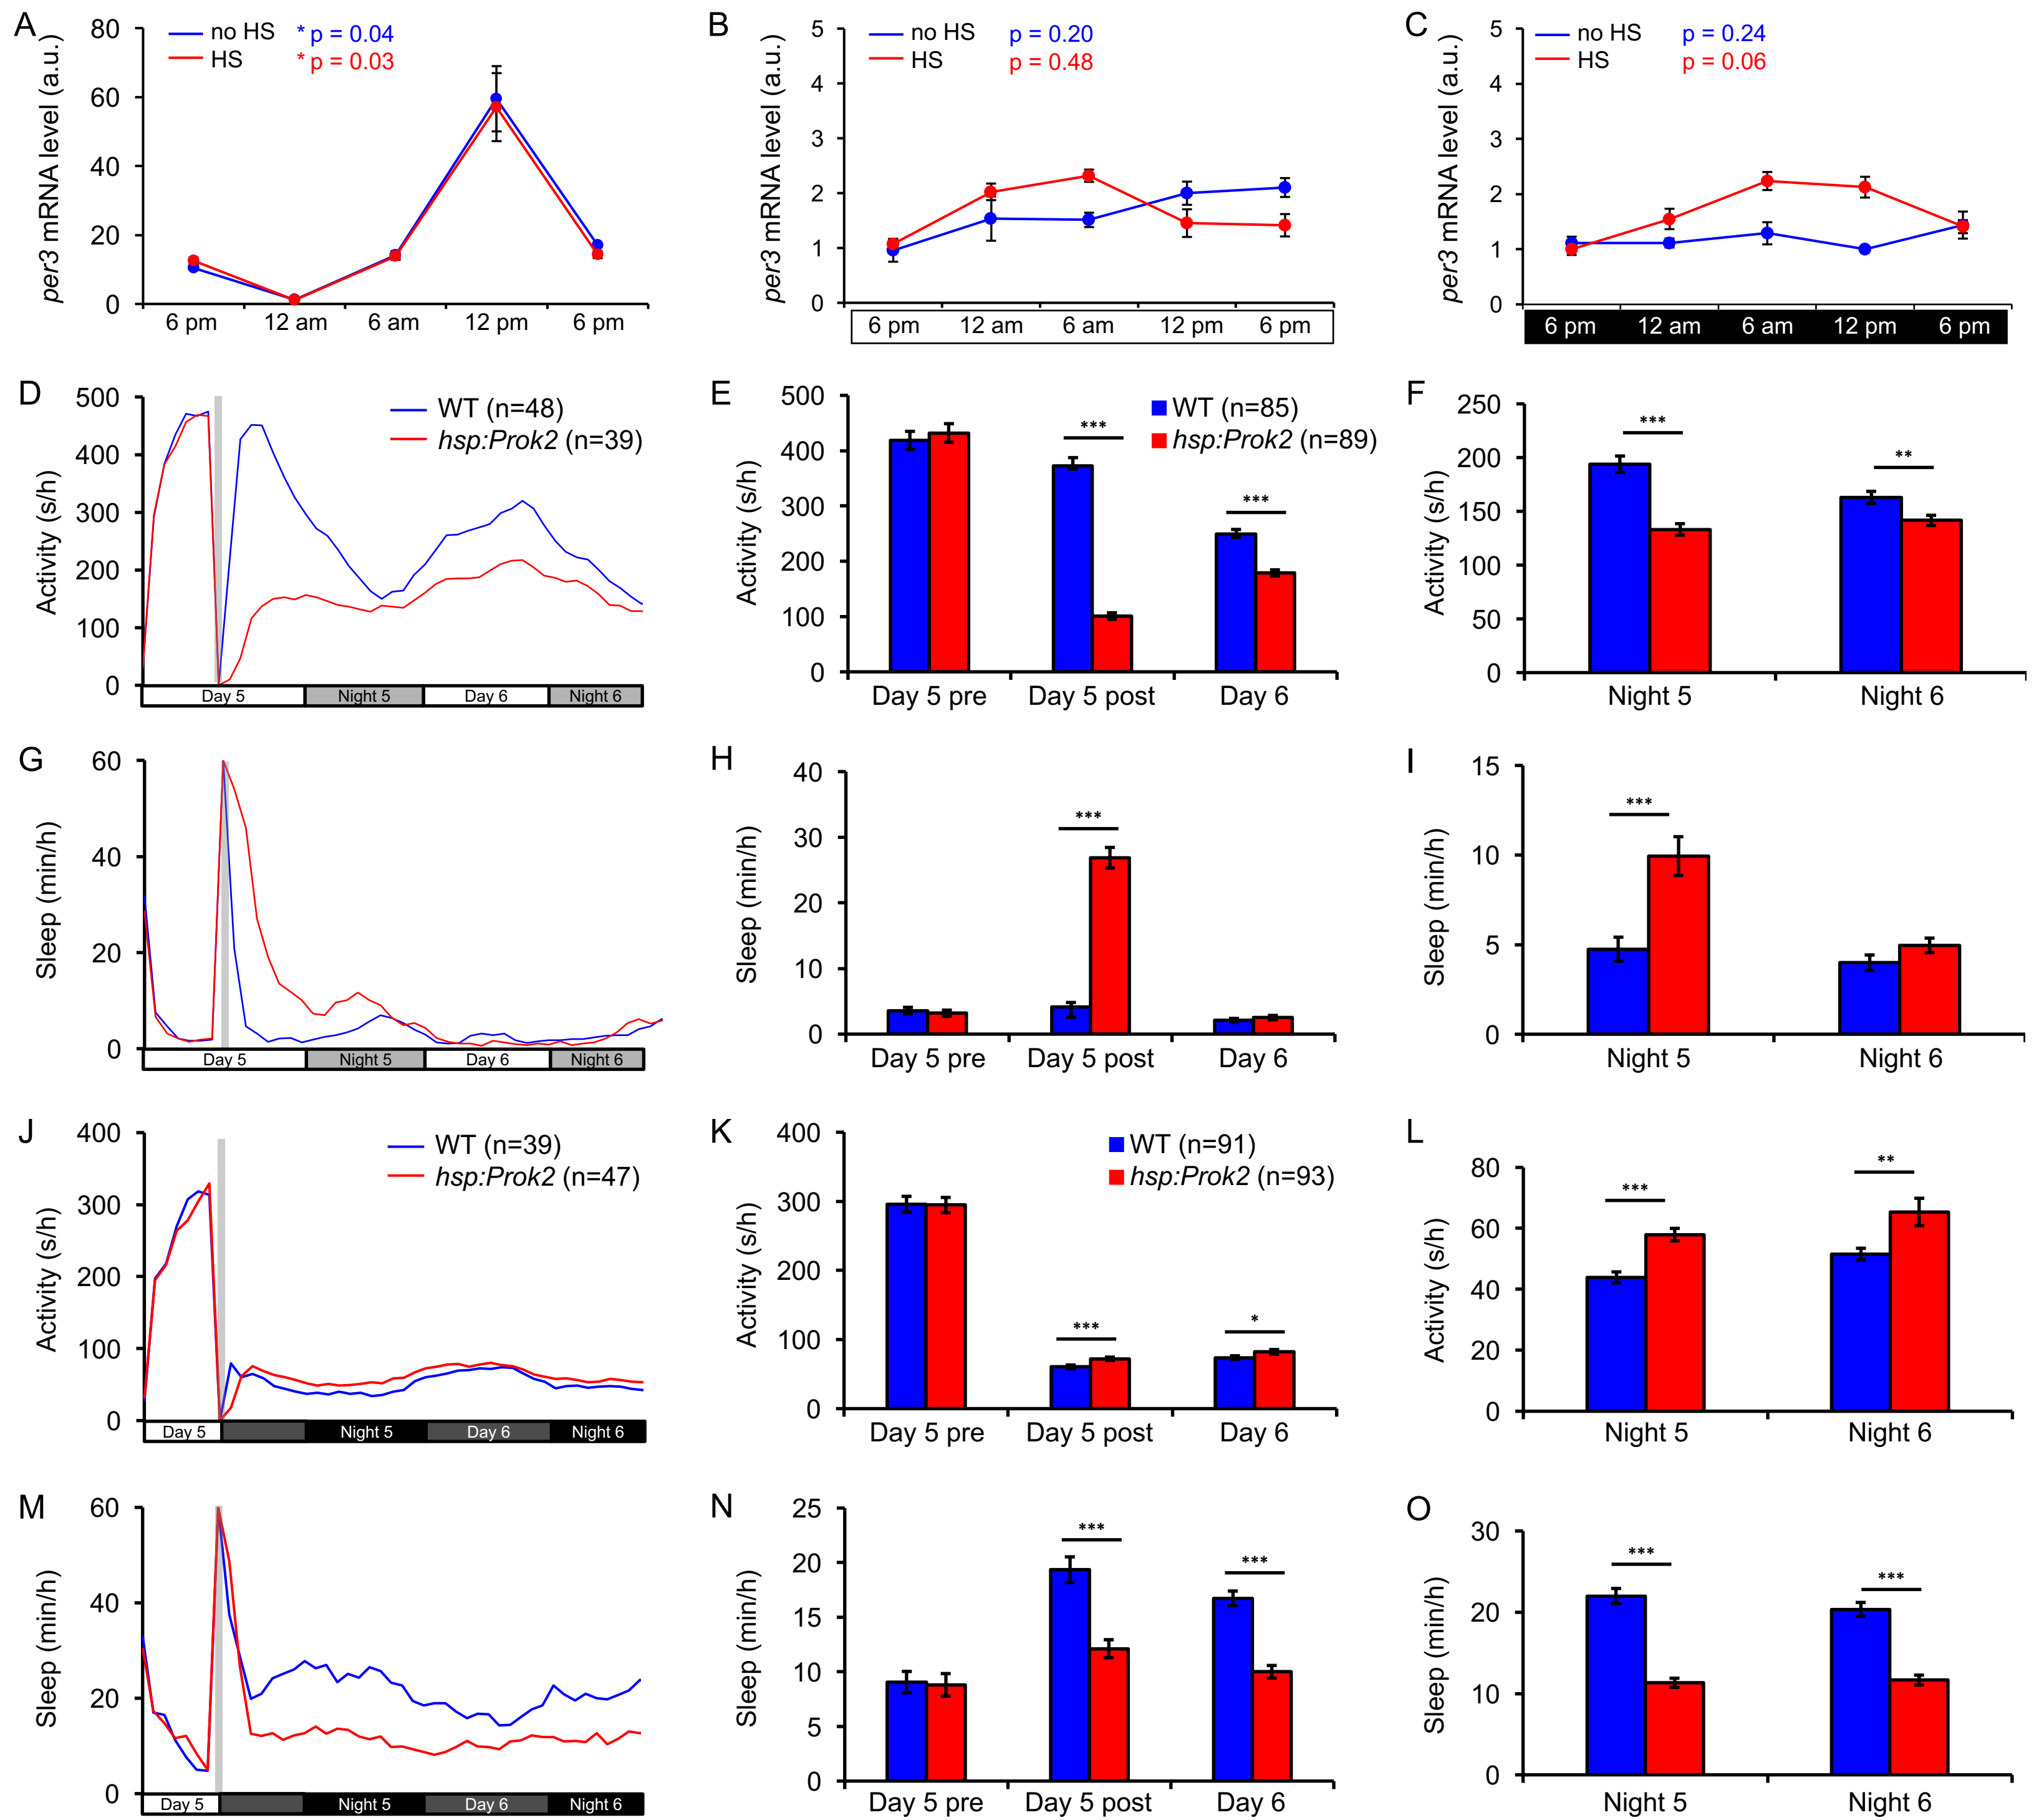



Figure S4

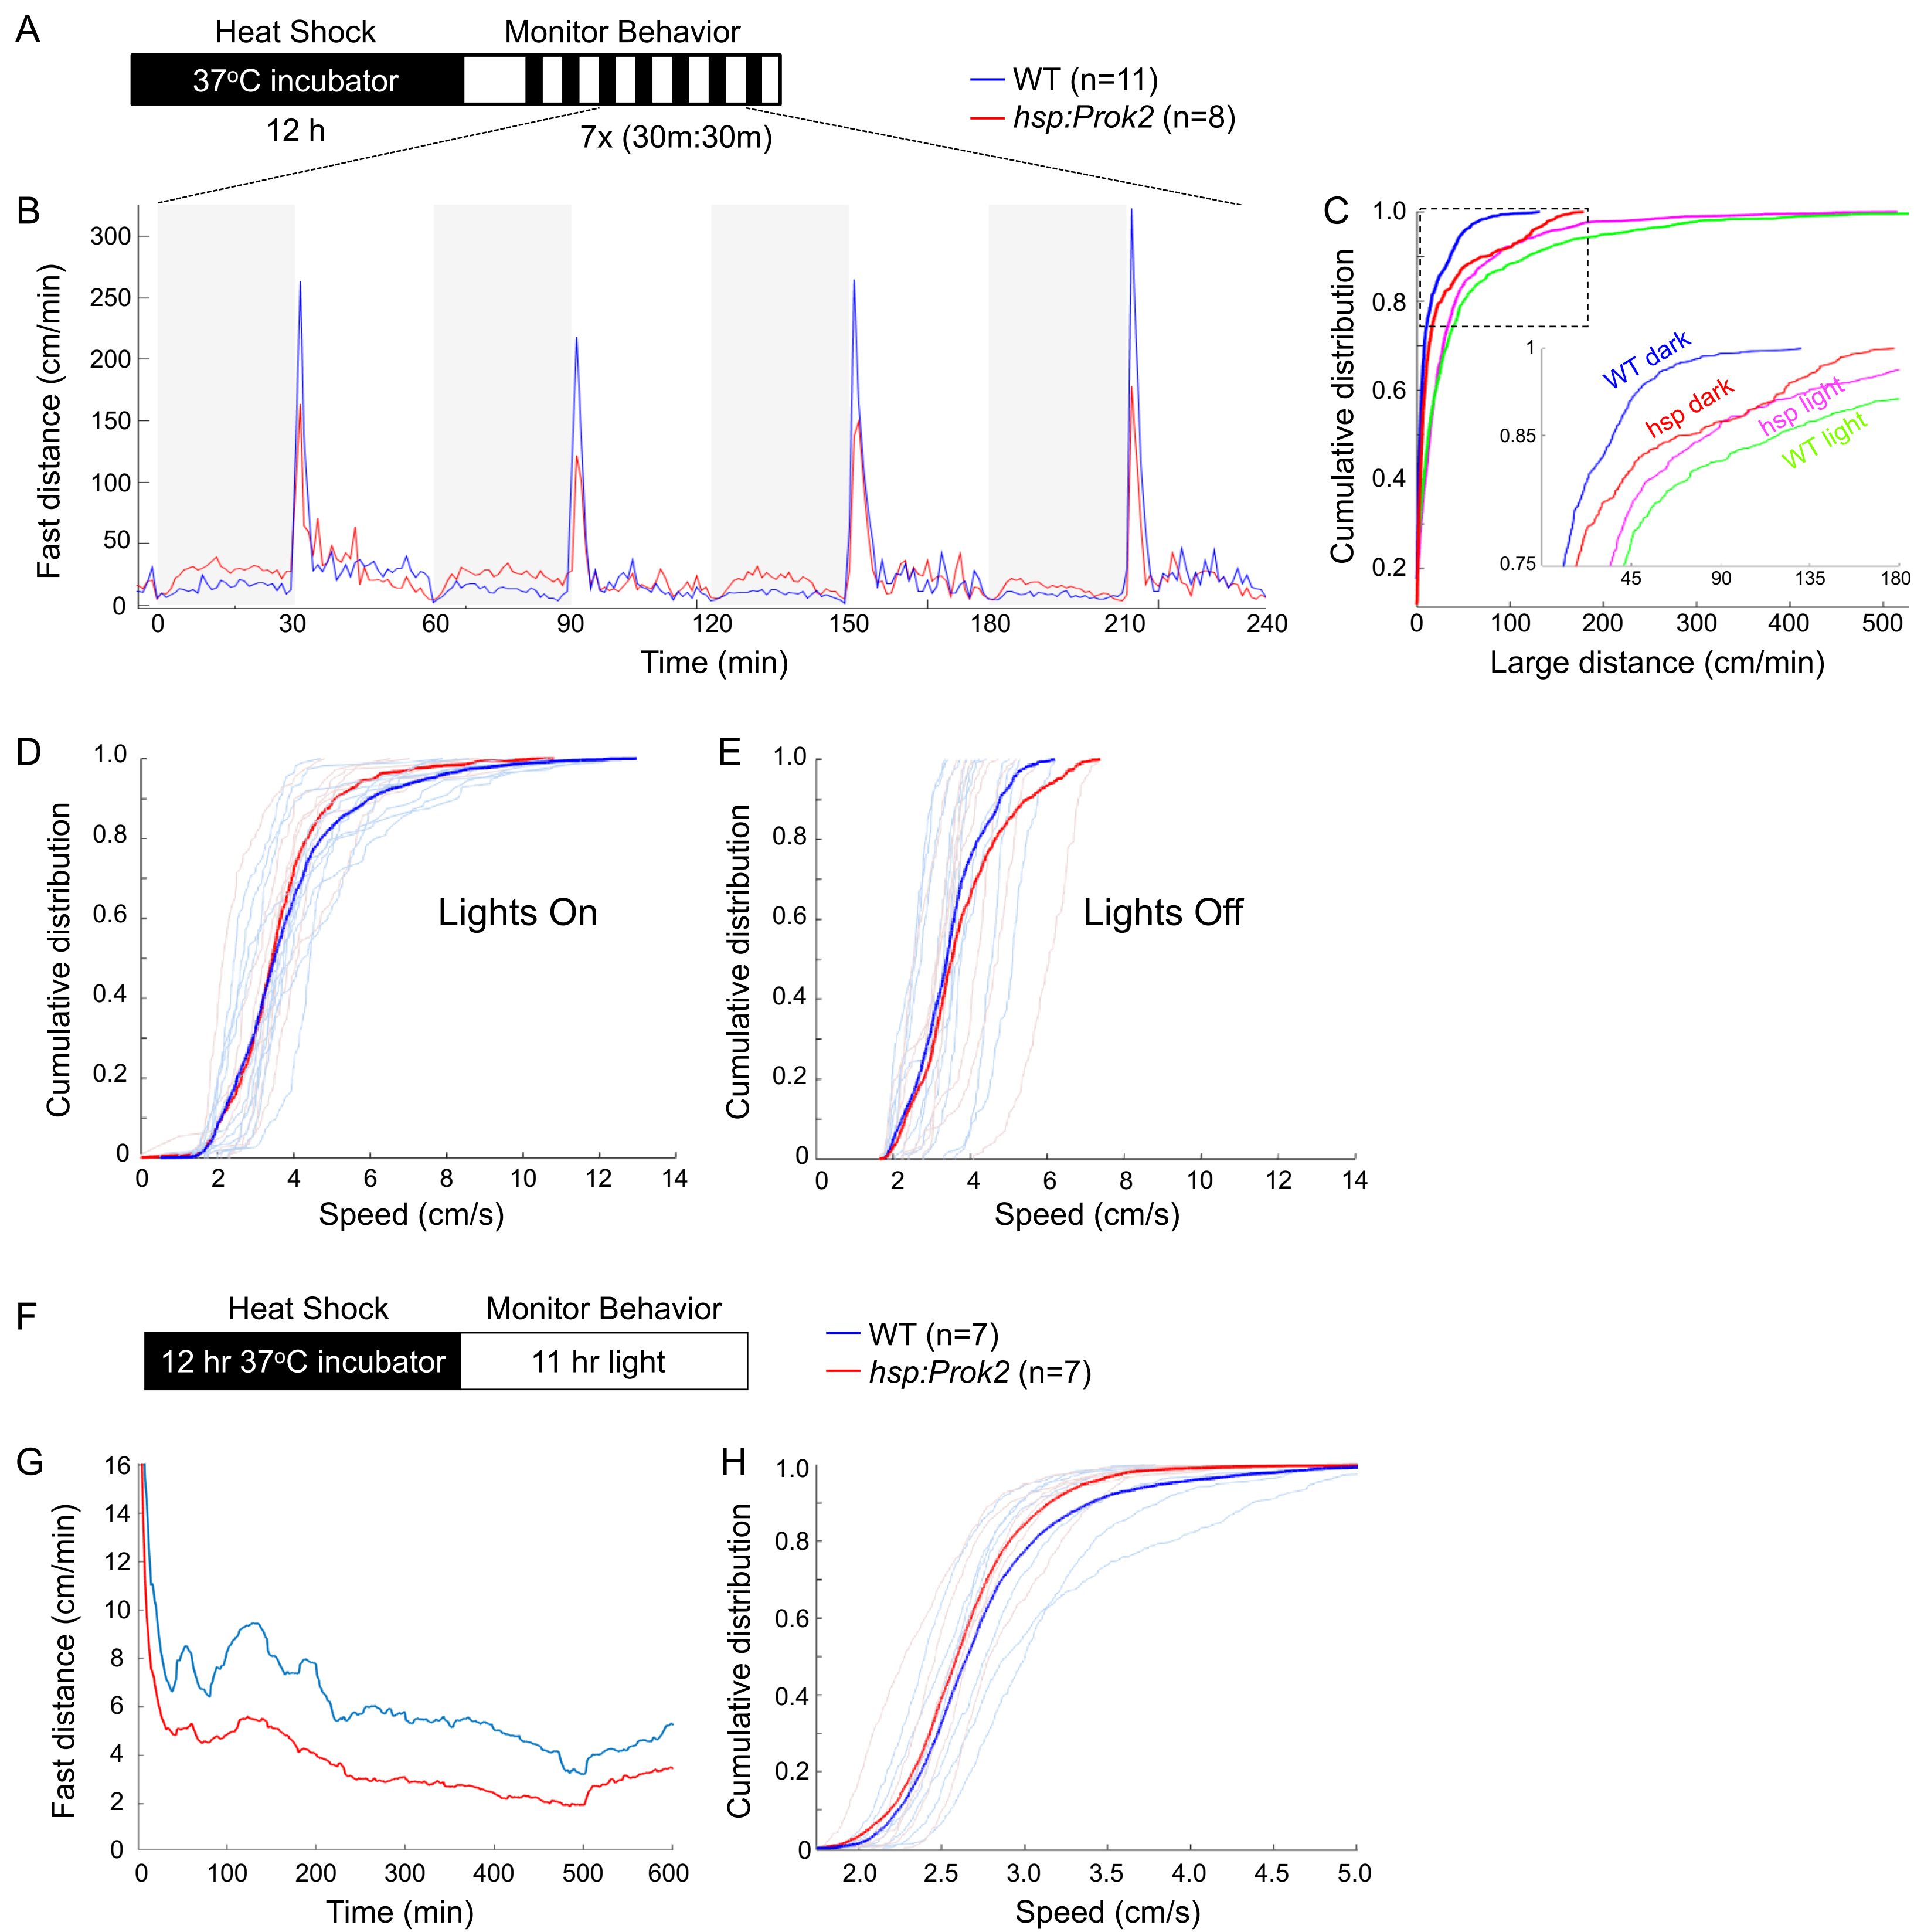



Figure S5

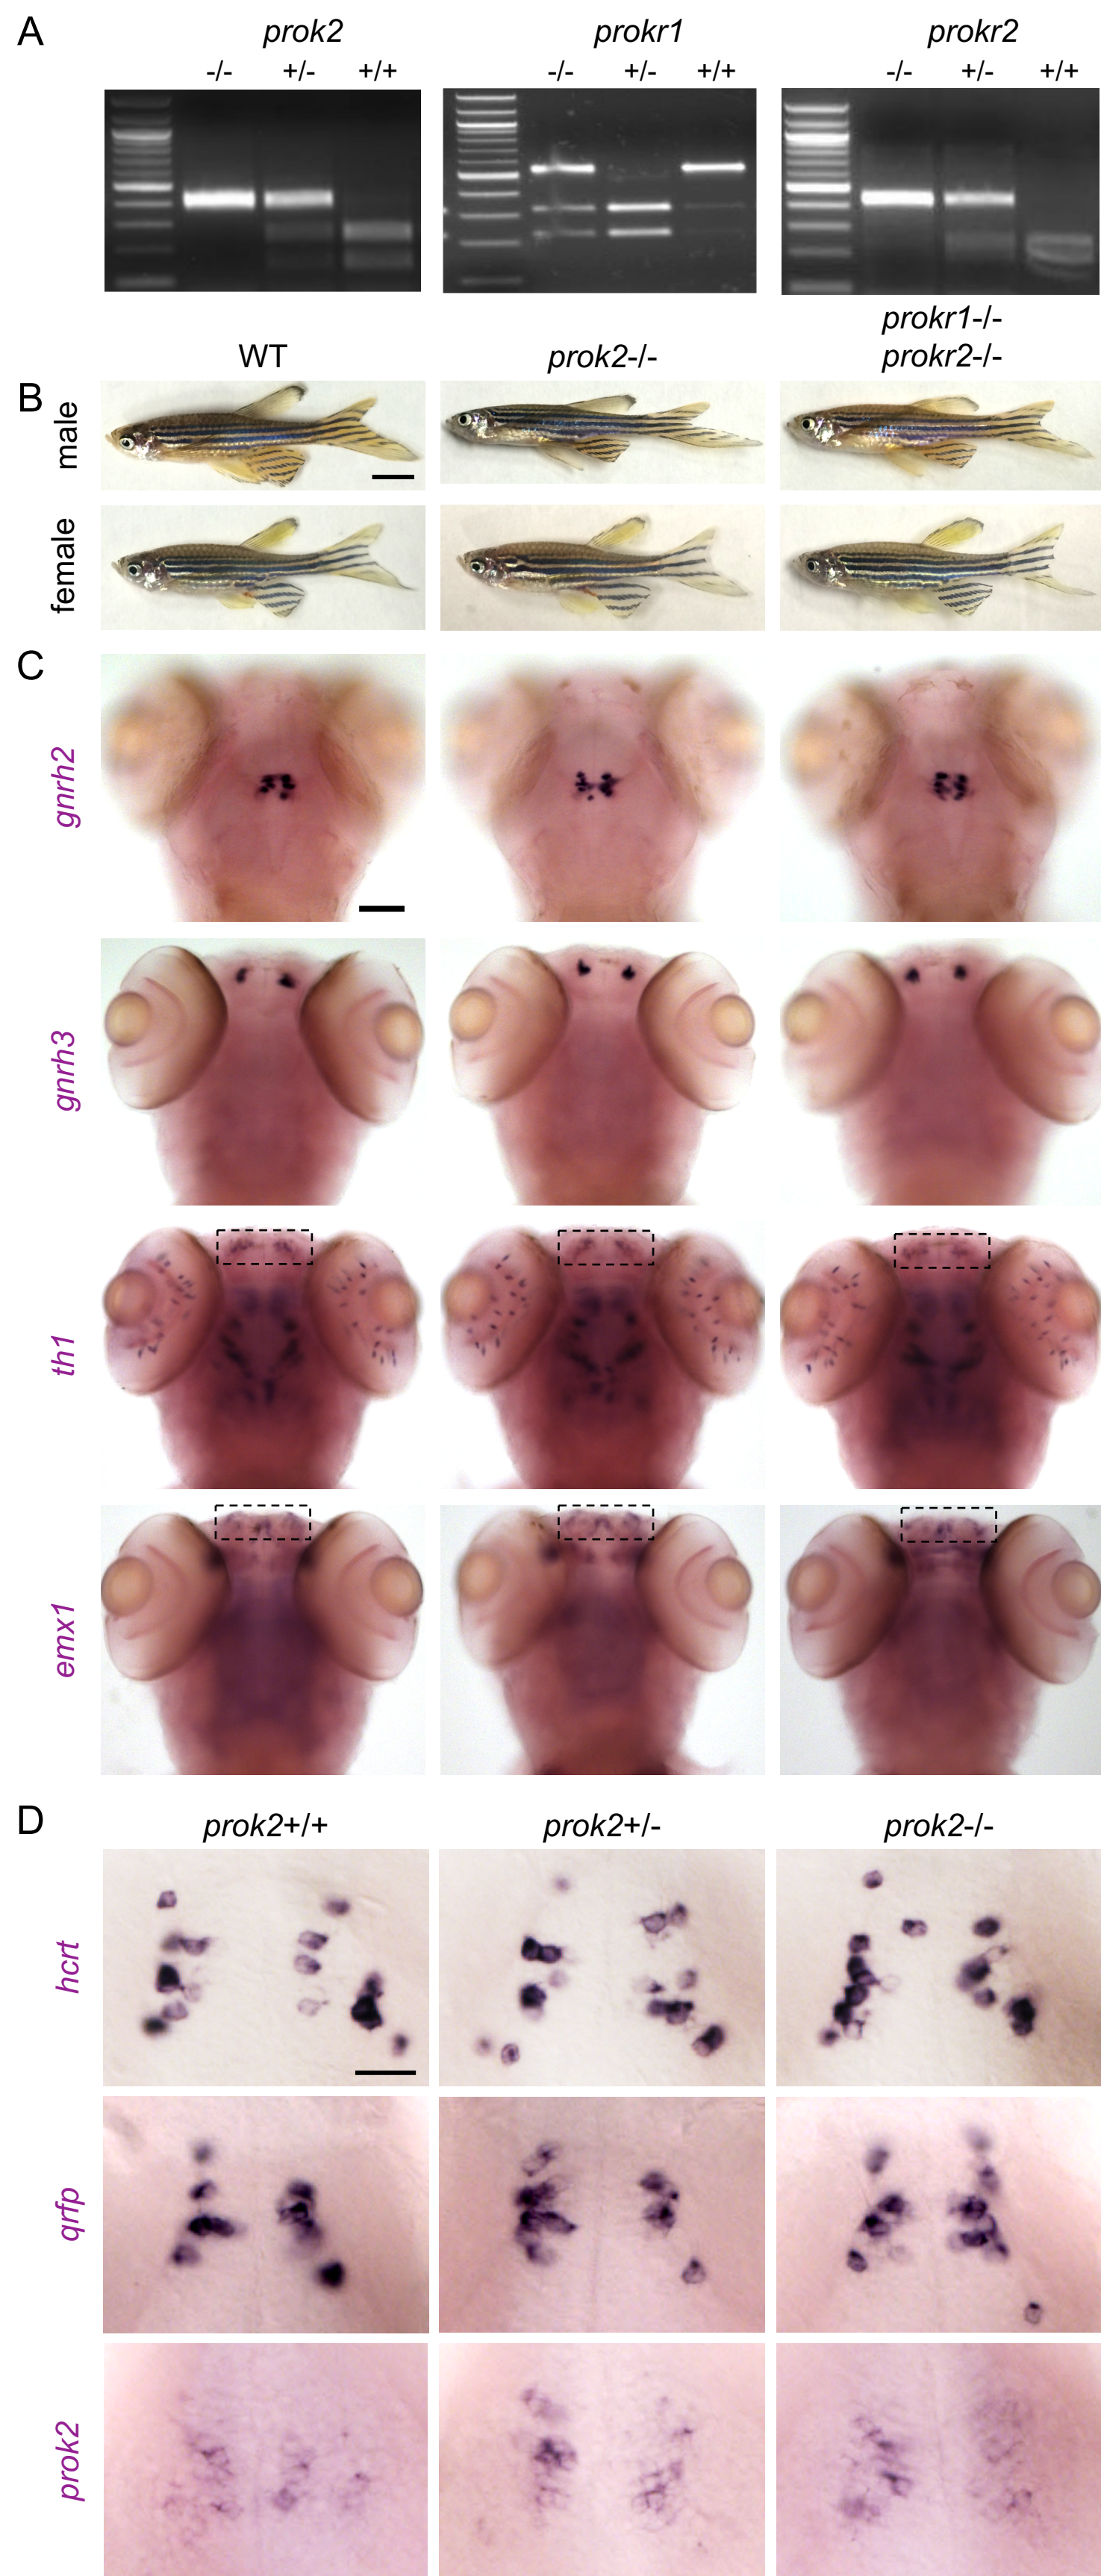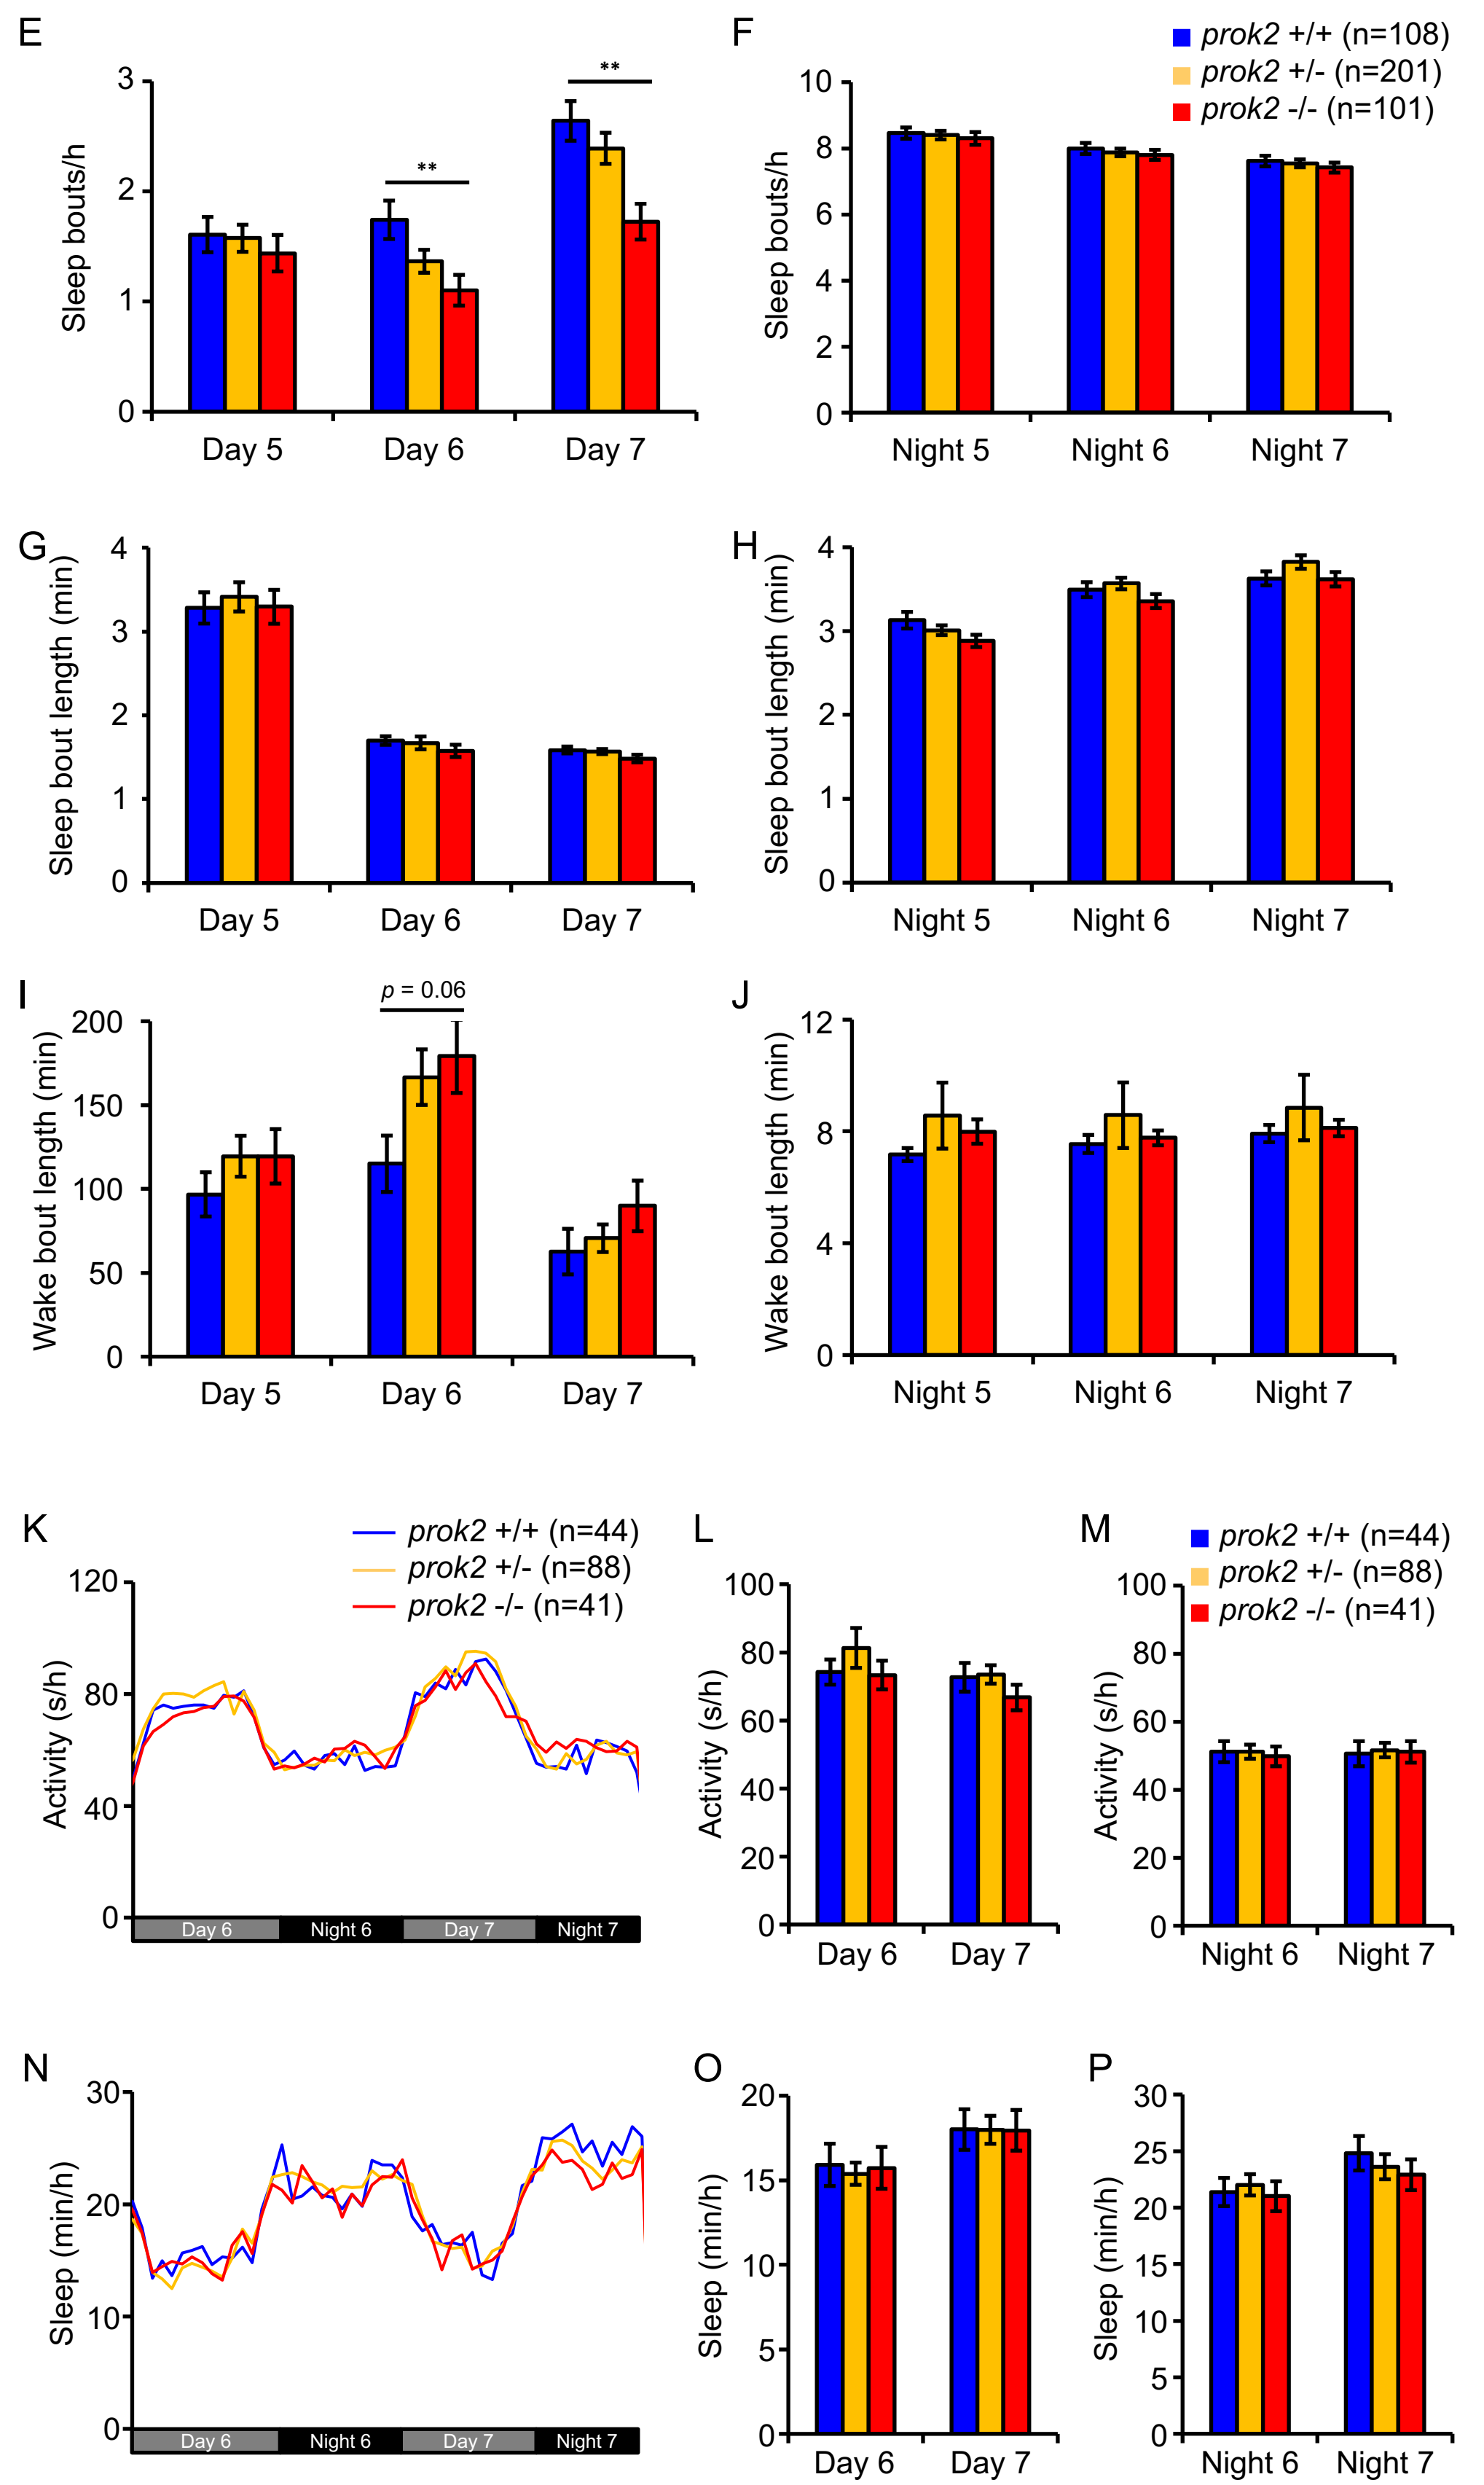



# Figure S6

| A                                                                                                      |                                                                                 | B                                                             |               |                                                                              |    |
|--------------------------------------------------------------------------------------------------------|---------------------------------------------------------------------------------|---------------------------------------------------------------|---------------|------------------------------------------------------------------------------|----|
| Prokr1_Hs                                                                                              | MEITMGEMDDNATNTSTSLVLIHFGAHATSFPFNFSYSDYDMPIDEDVDVNSRTFFFAAKIVIGMALVGMVLVCGIGN  | 80                                                            | Prokr2_Hs     | MAAONGTSTFTFNPPPODHASSLSFN-----SYGDYDLDEDEDEMTKTRTFFAAKIVIGLAGLMLVCGIGNFVEI  | 75 |
| Prokr1_Mm                                                                                              | MEITVIGALGENTTFTTIDFSLDGHFAOTGSLPFTFSYSDYDMPIDEDVDVNSRTFFFAAKIVIGMALVGMVLVCGIGN | 80                                                            | Prokr2_Mm     | MGFQNRNTSFAADINPPPODHVS-----YSYGDYDLDEDEDEMTKTRTFFAAKIVIGLAGLMLVCGIGNFVEI    | 72 |
| Prokr1_Dr                                                                                              | MTE-----NNTSFTWLIHPSGSPHD-----LIYDIP-VDYEVVVDIPIHOGRAFFVAVIVIAMVLVCGIGN         | 69                                                            | Prokr2_Dr     | MODANISHV-AAVYVS-----HSPFVPLVDVHYTDFYDMDYGVPAEEMPDHOGGLAYVAIVIGVVLVCGIGNFVFI | 79 |
| Prokr1_Dr d7                                                                                           | MTE-----NNTSFTWLIHPSGSPHD-----LIYDIP-VDYEVVVDIPIHOGRAFFVAVIVIAMVLVCGIGN         | 69                                                            | Prokr2_Dr d1  | MODAISATWLYT                                                                 | 13 |
| Prokr1_Dr d22                                                                                          | MTE-----NNTSFTWLIHPSGSPHD-----LIYDIP-VDYEVVVDIPIHOGRAFFVAVIVIAMVLVCGIGN         | 69                                                            | Prokr2_Dr d14 | MOPRGSCITRESSQSRSCSGCP                                                       | 21 |
| <p>TM2</p> <p>Prokr1_Hs</p> <p>Prokr1_Mm</p> <p>Prokr1_Dr</p> <p>Prokr1_Dr d7</p> <p>Prokr1_Dr d22</p> |                                                                                 | <p>TM3</p> <p>Prokr2_Hs</p> <p>Prokr2_Mm</p> <p>Prokr2_Dr</p> |               |                                                                              |    |
| <p>TM4</p> <p>Prokr1_Hs</p> <p>Prokr1_Mm</p> <p>Prokr1_Dr</p> <p>Prokr1_Dr d7</p> <p>Prokr1_Dr d22</p> |                                                                                 | <p>TM5</p> <p>Prokr2_Hs</p> <p>Prokr2_Mm</p> <p>Prokr2_Dr</p> |               |                                                                              |    |
| <p>TM5</p> <p>Prokr1_Hs</p> <p>Prokr1_Mm</p> <p>Prokr1_Dr</p>                                          |                                                                                 | <p>TM6</p> <p>Prokr2_Hs</p> <p>Prokr2_Mm</p> <p>Prokr2_Dr</p> |               |                                                                              |    |
| <p>TM7</p> <p>Prokr1_Hs</p> <p>Prokr1_Mm</p> <p>Prokr1_Dr</p>                                          |                                                                                 | <p>TM7</p> <p>Prokr2_Hs</p> <p>Prokr2_Mm</p> <p>Prokr2_Dr</p> |               |                                                                              |    |

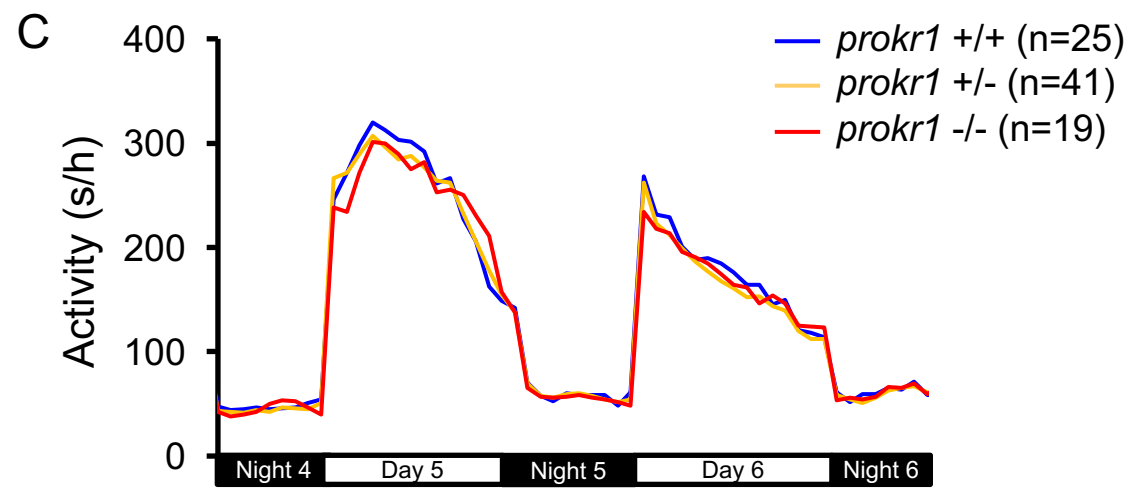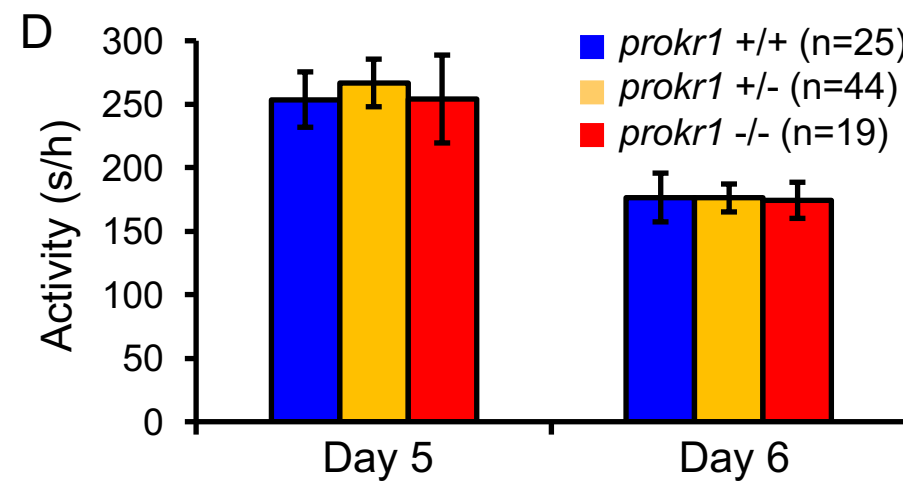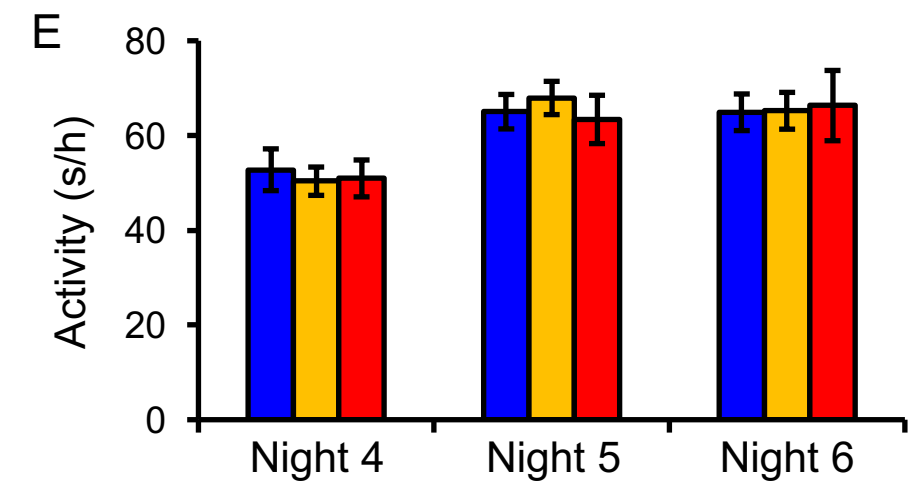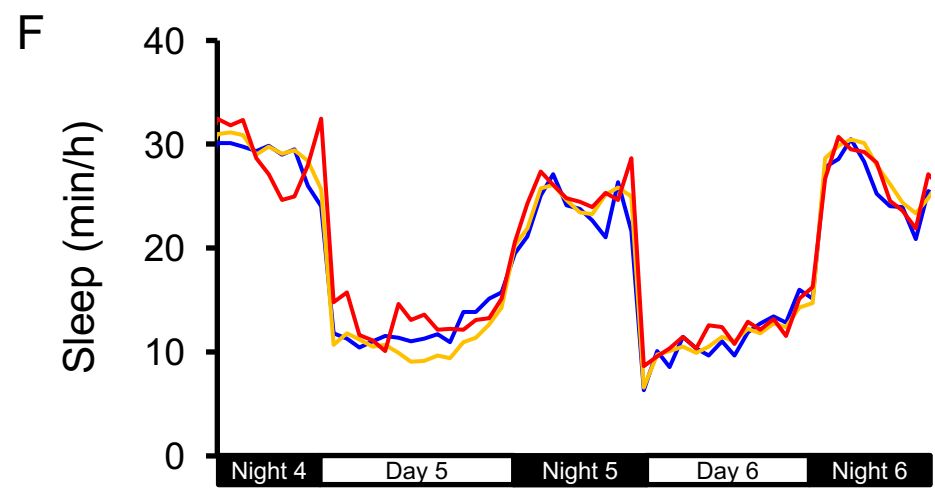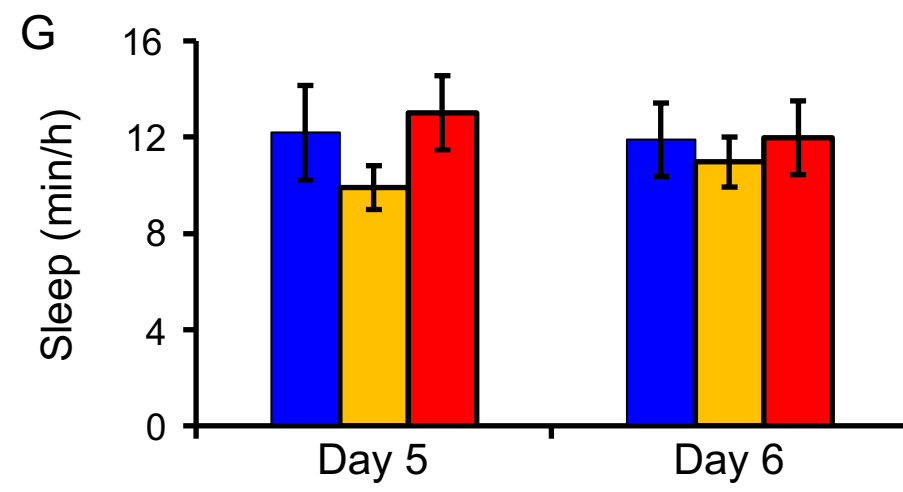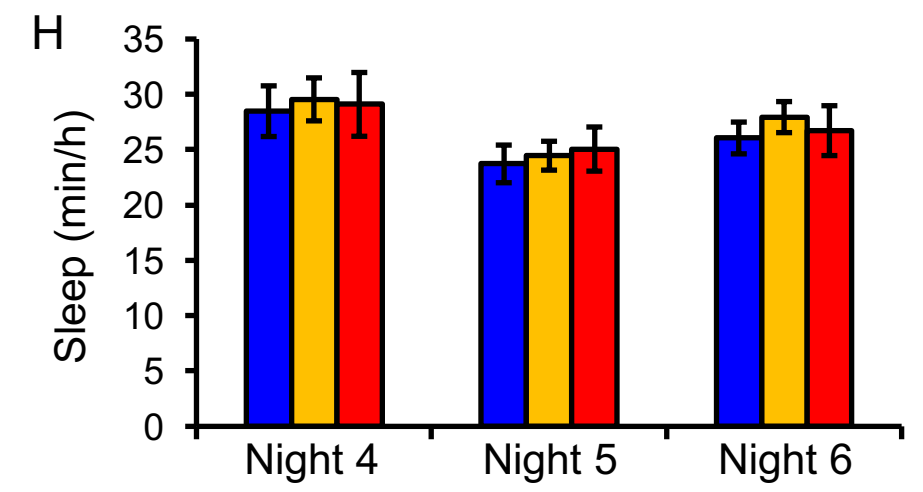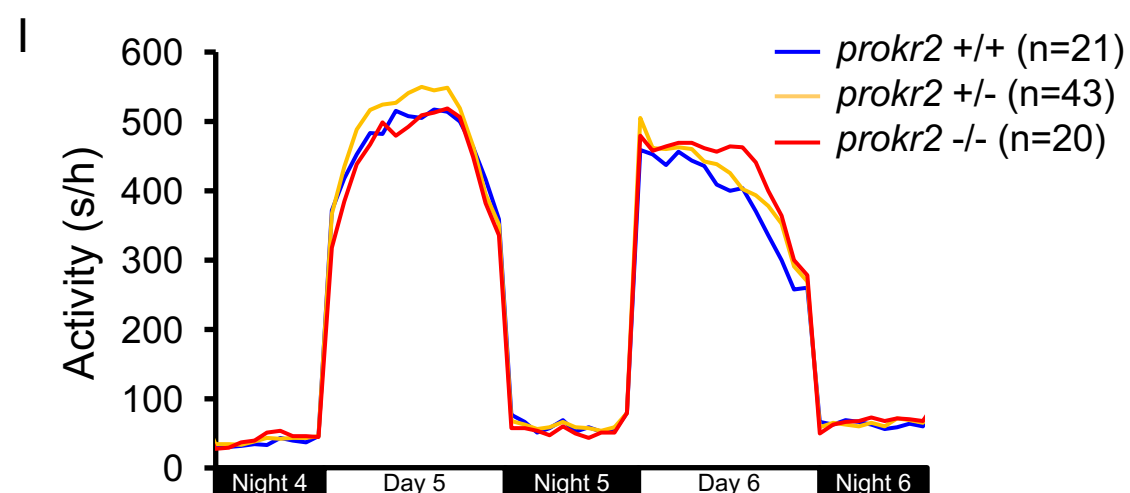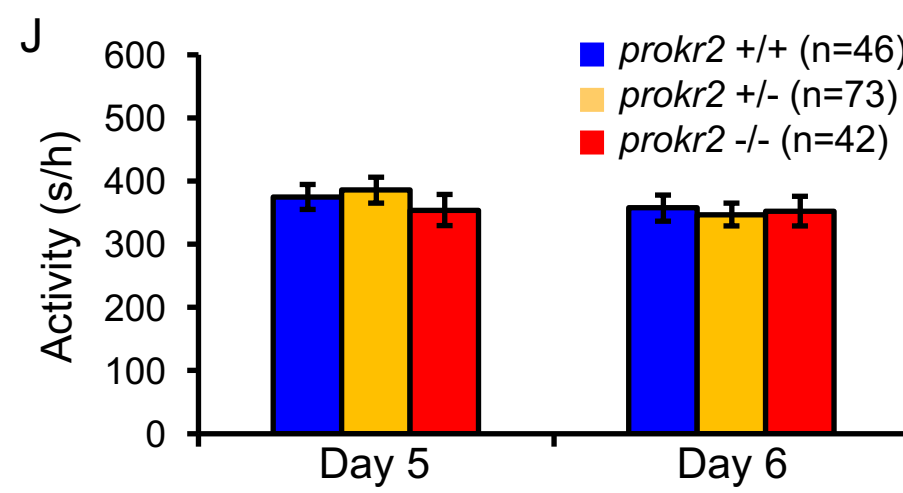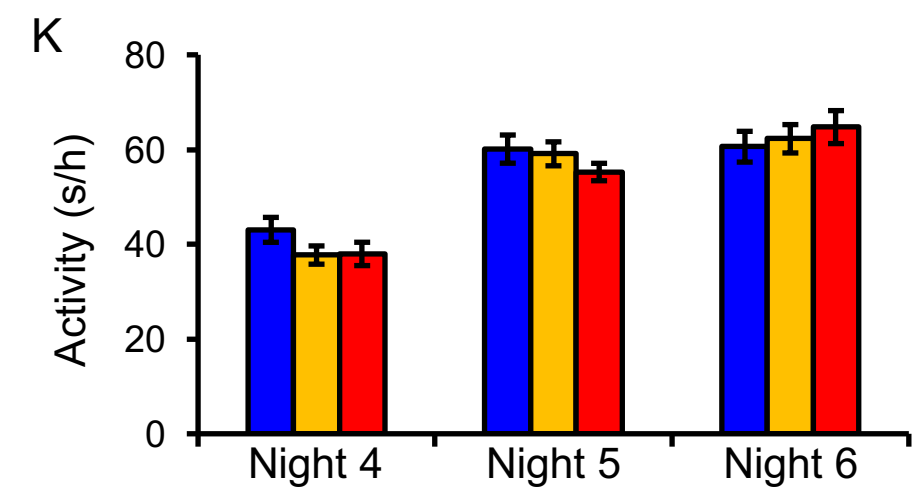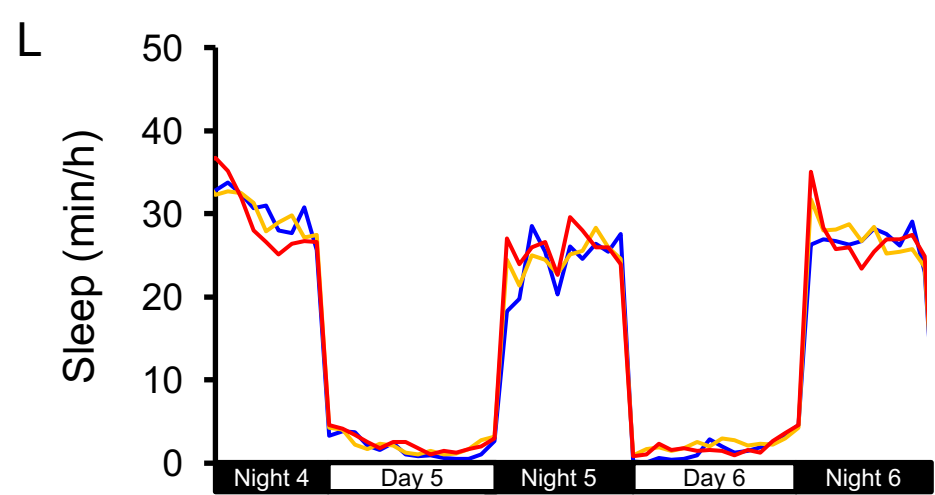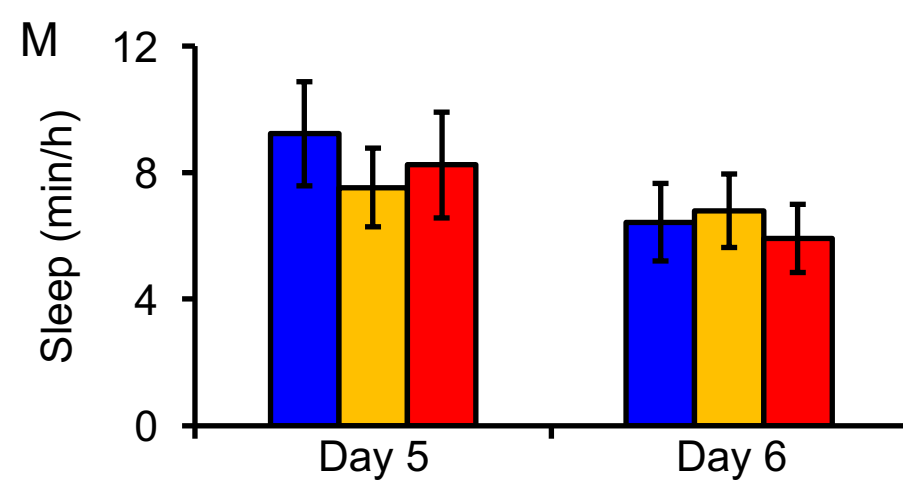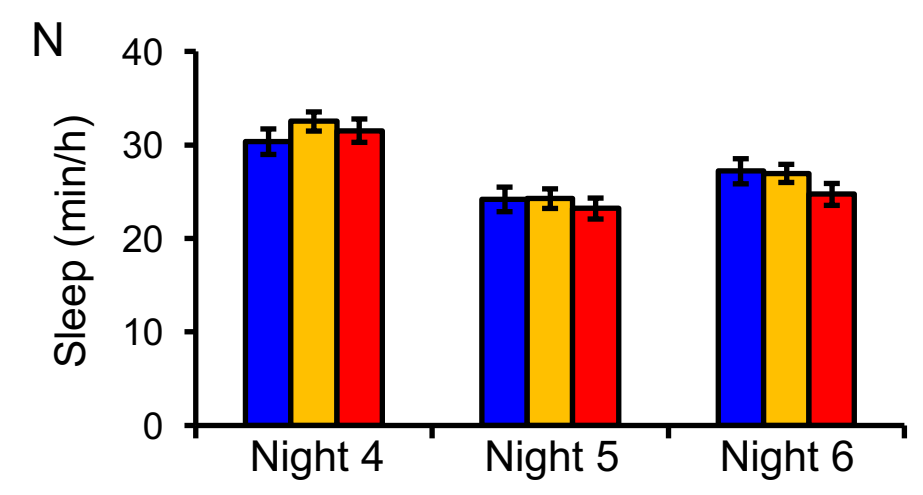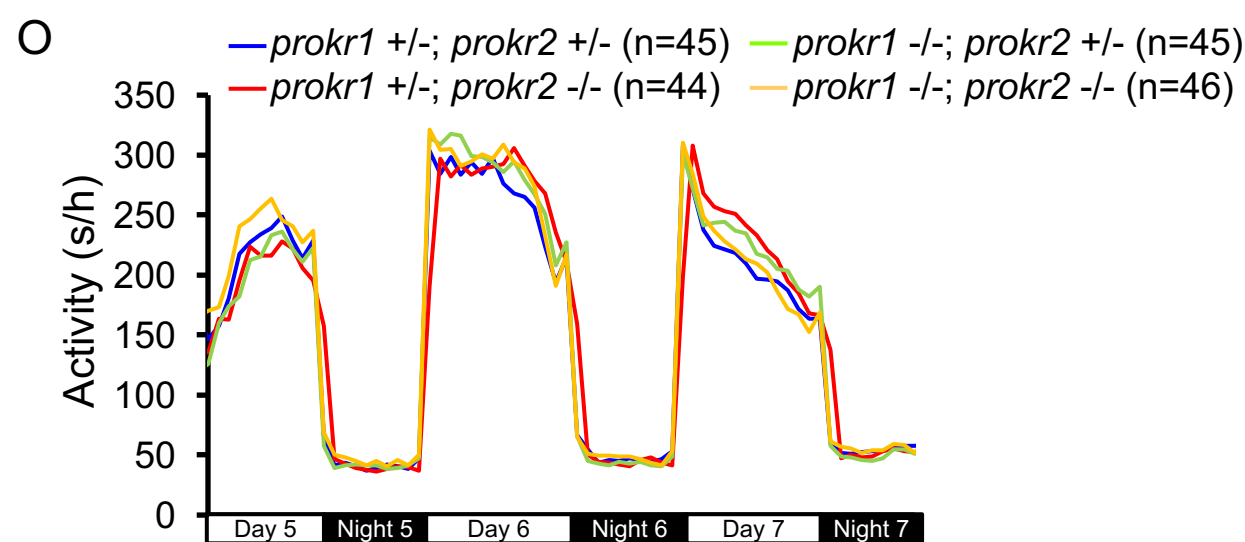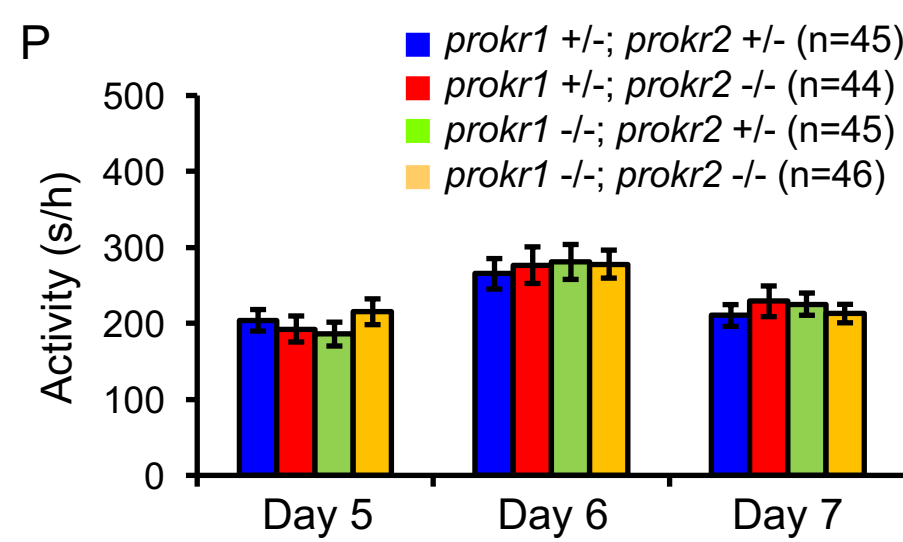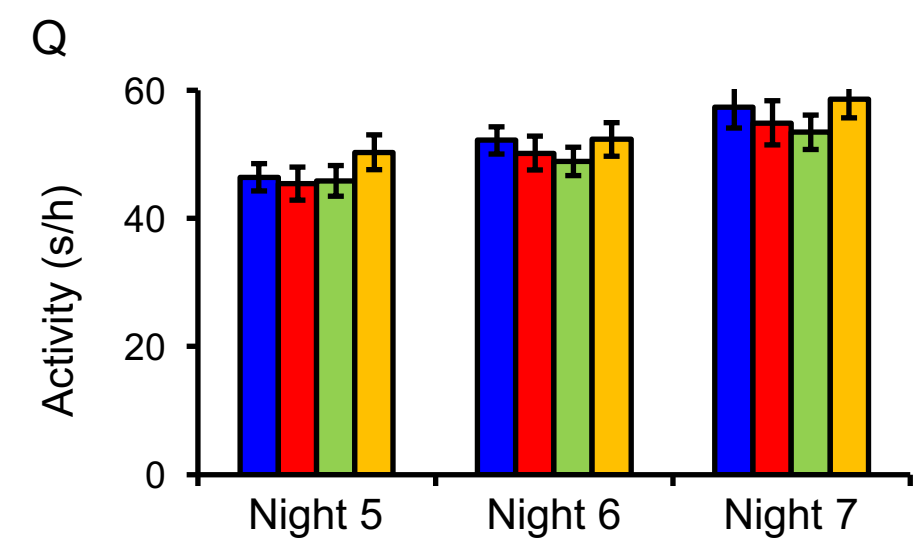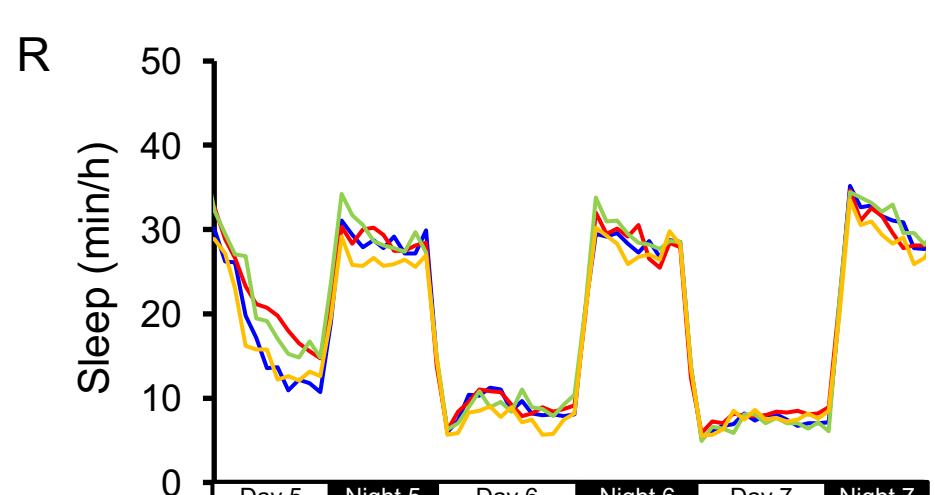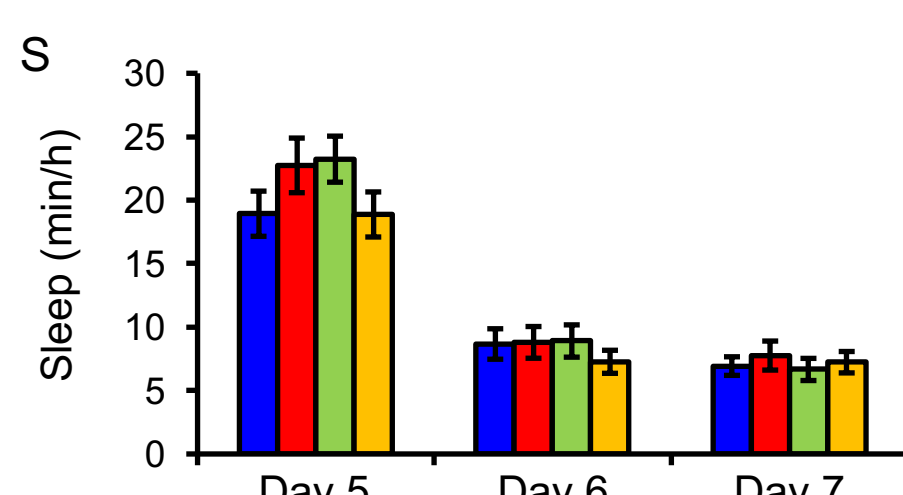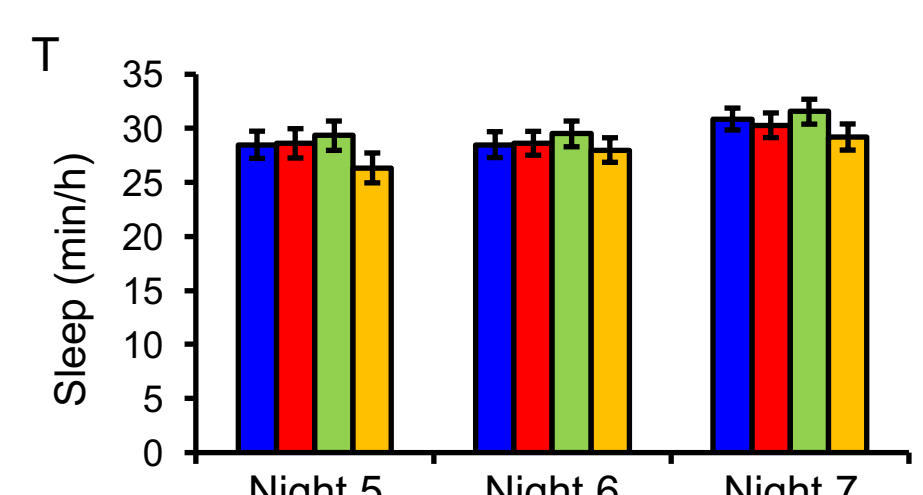

Figure S7

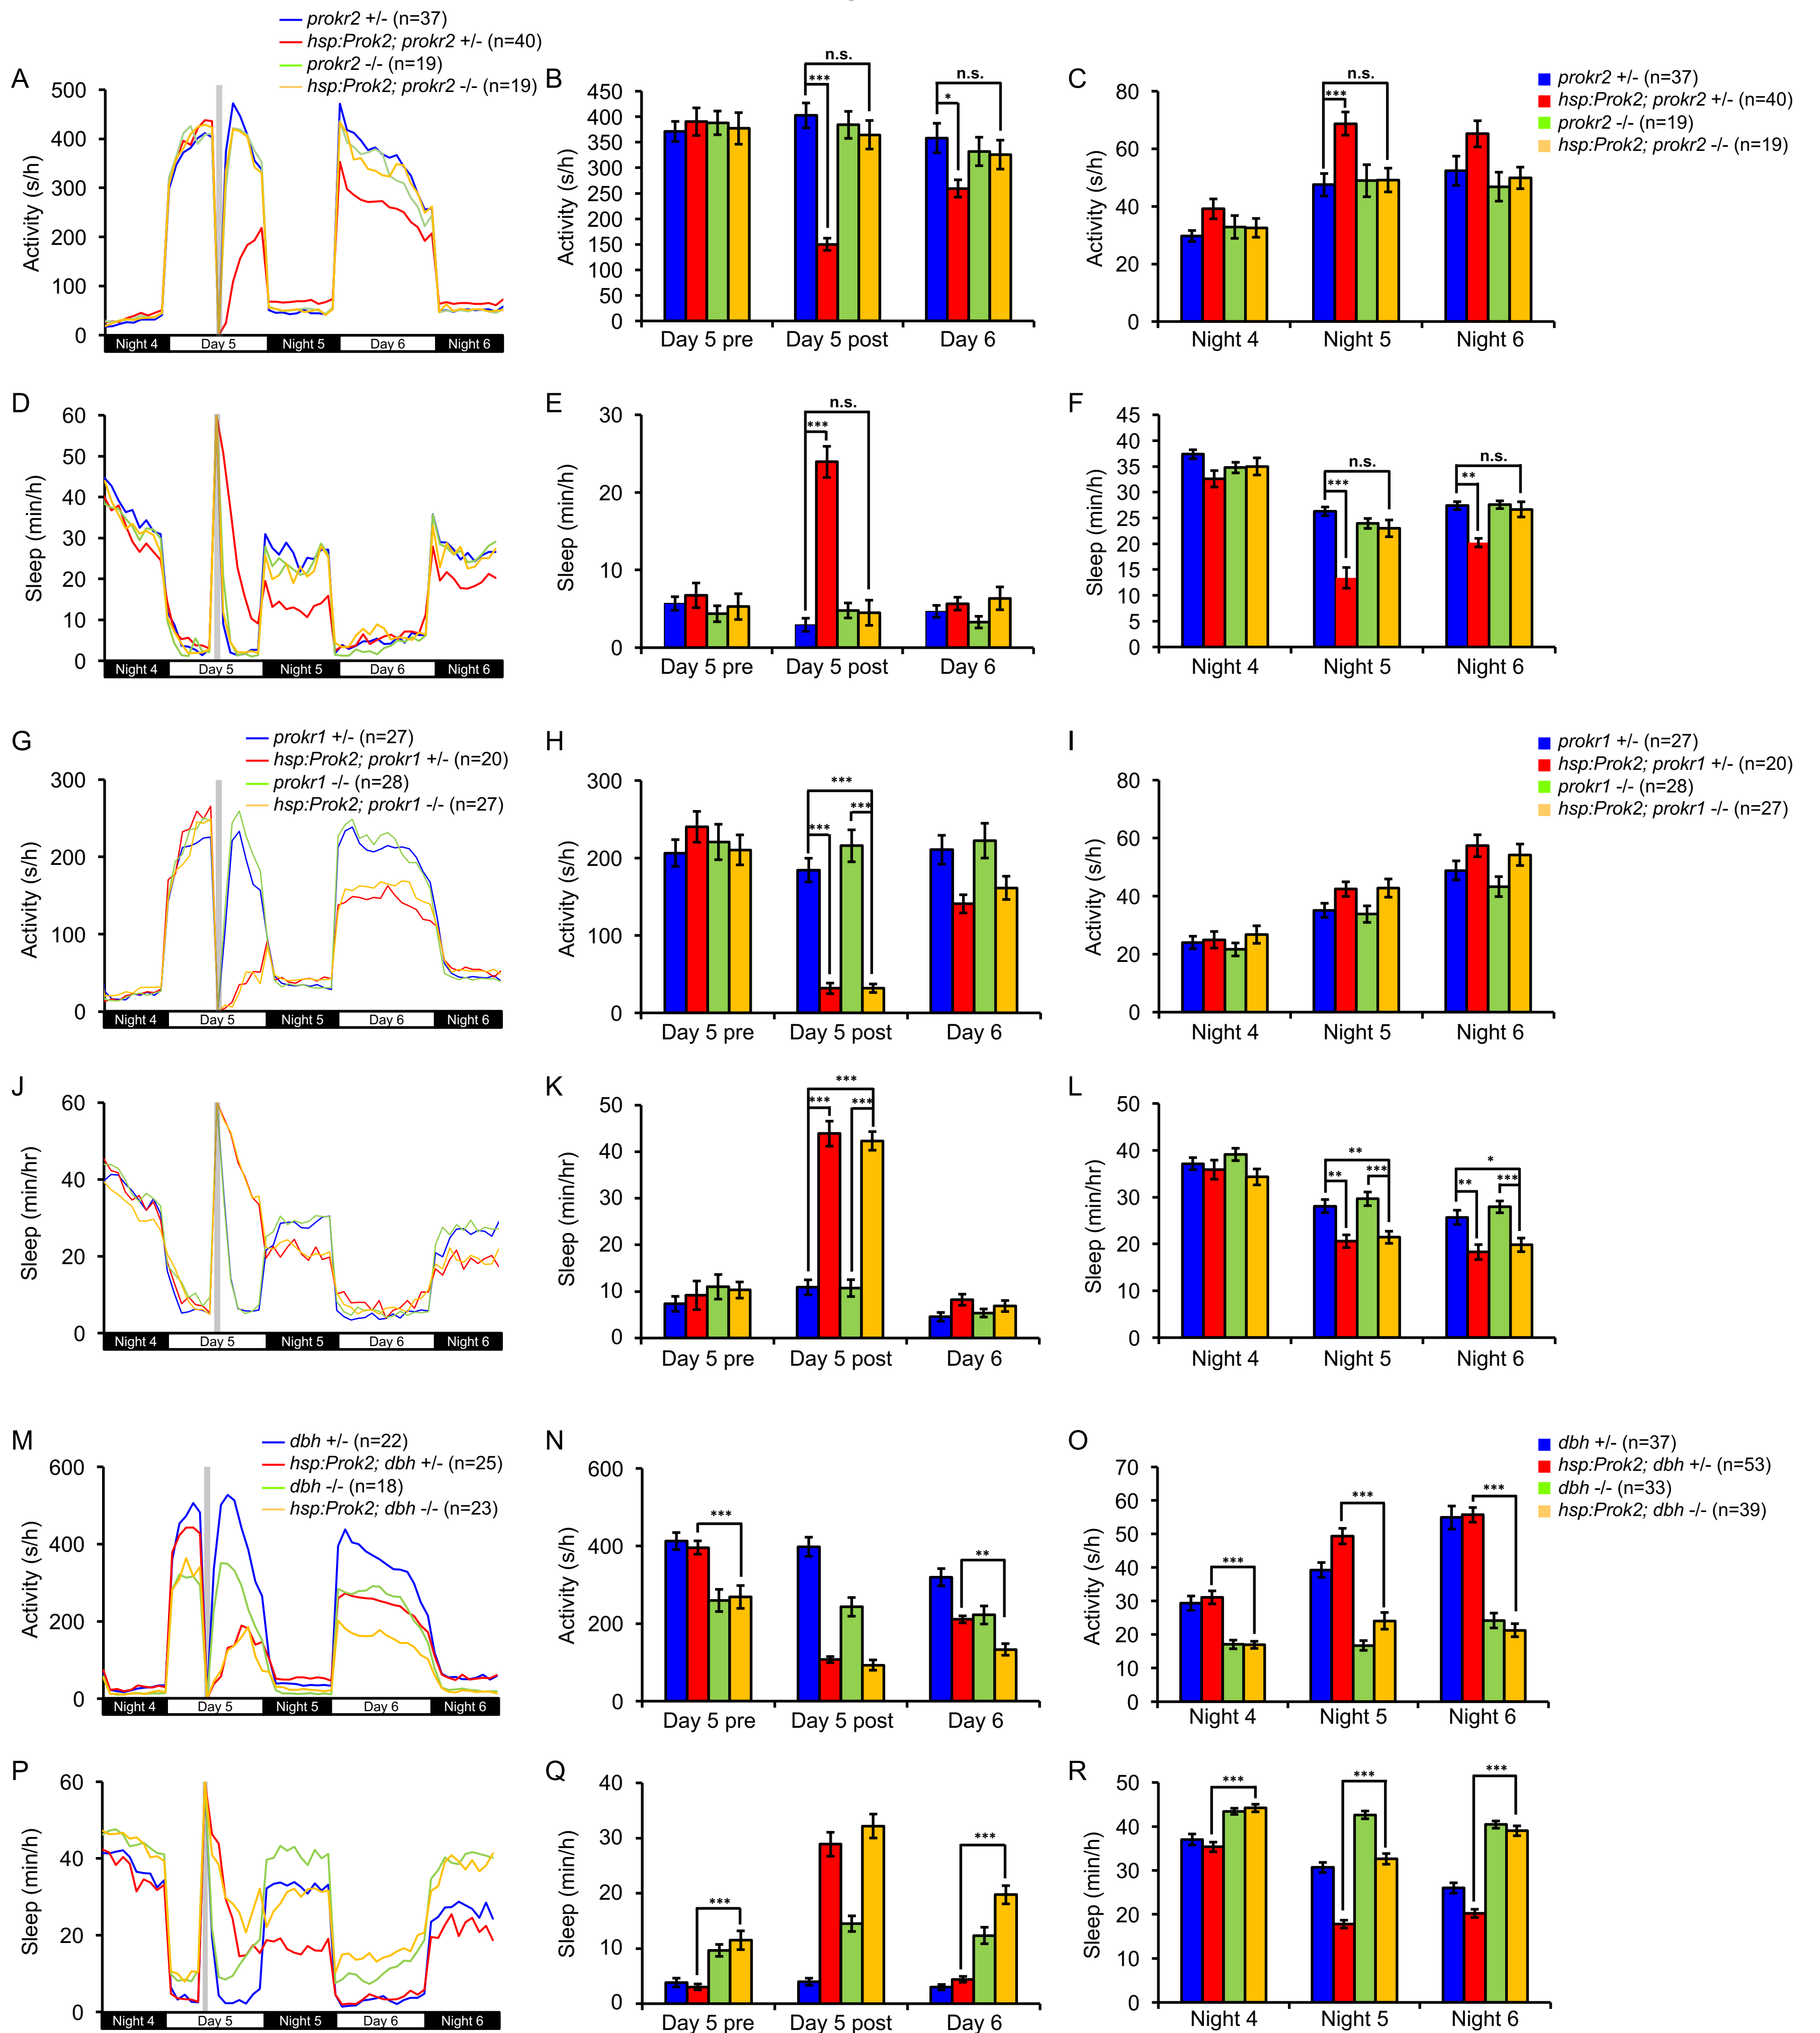



Figure S8

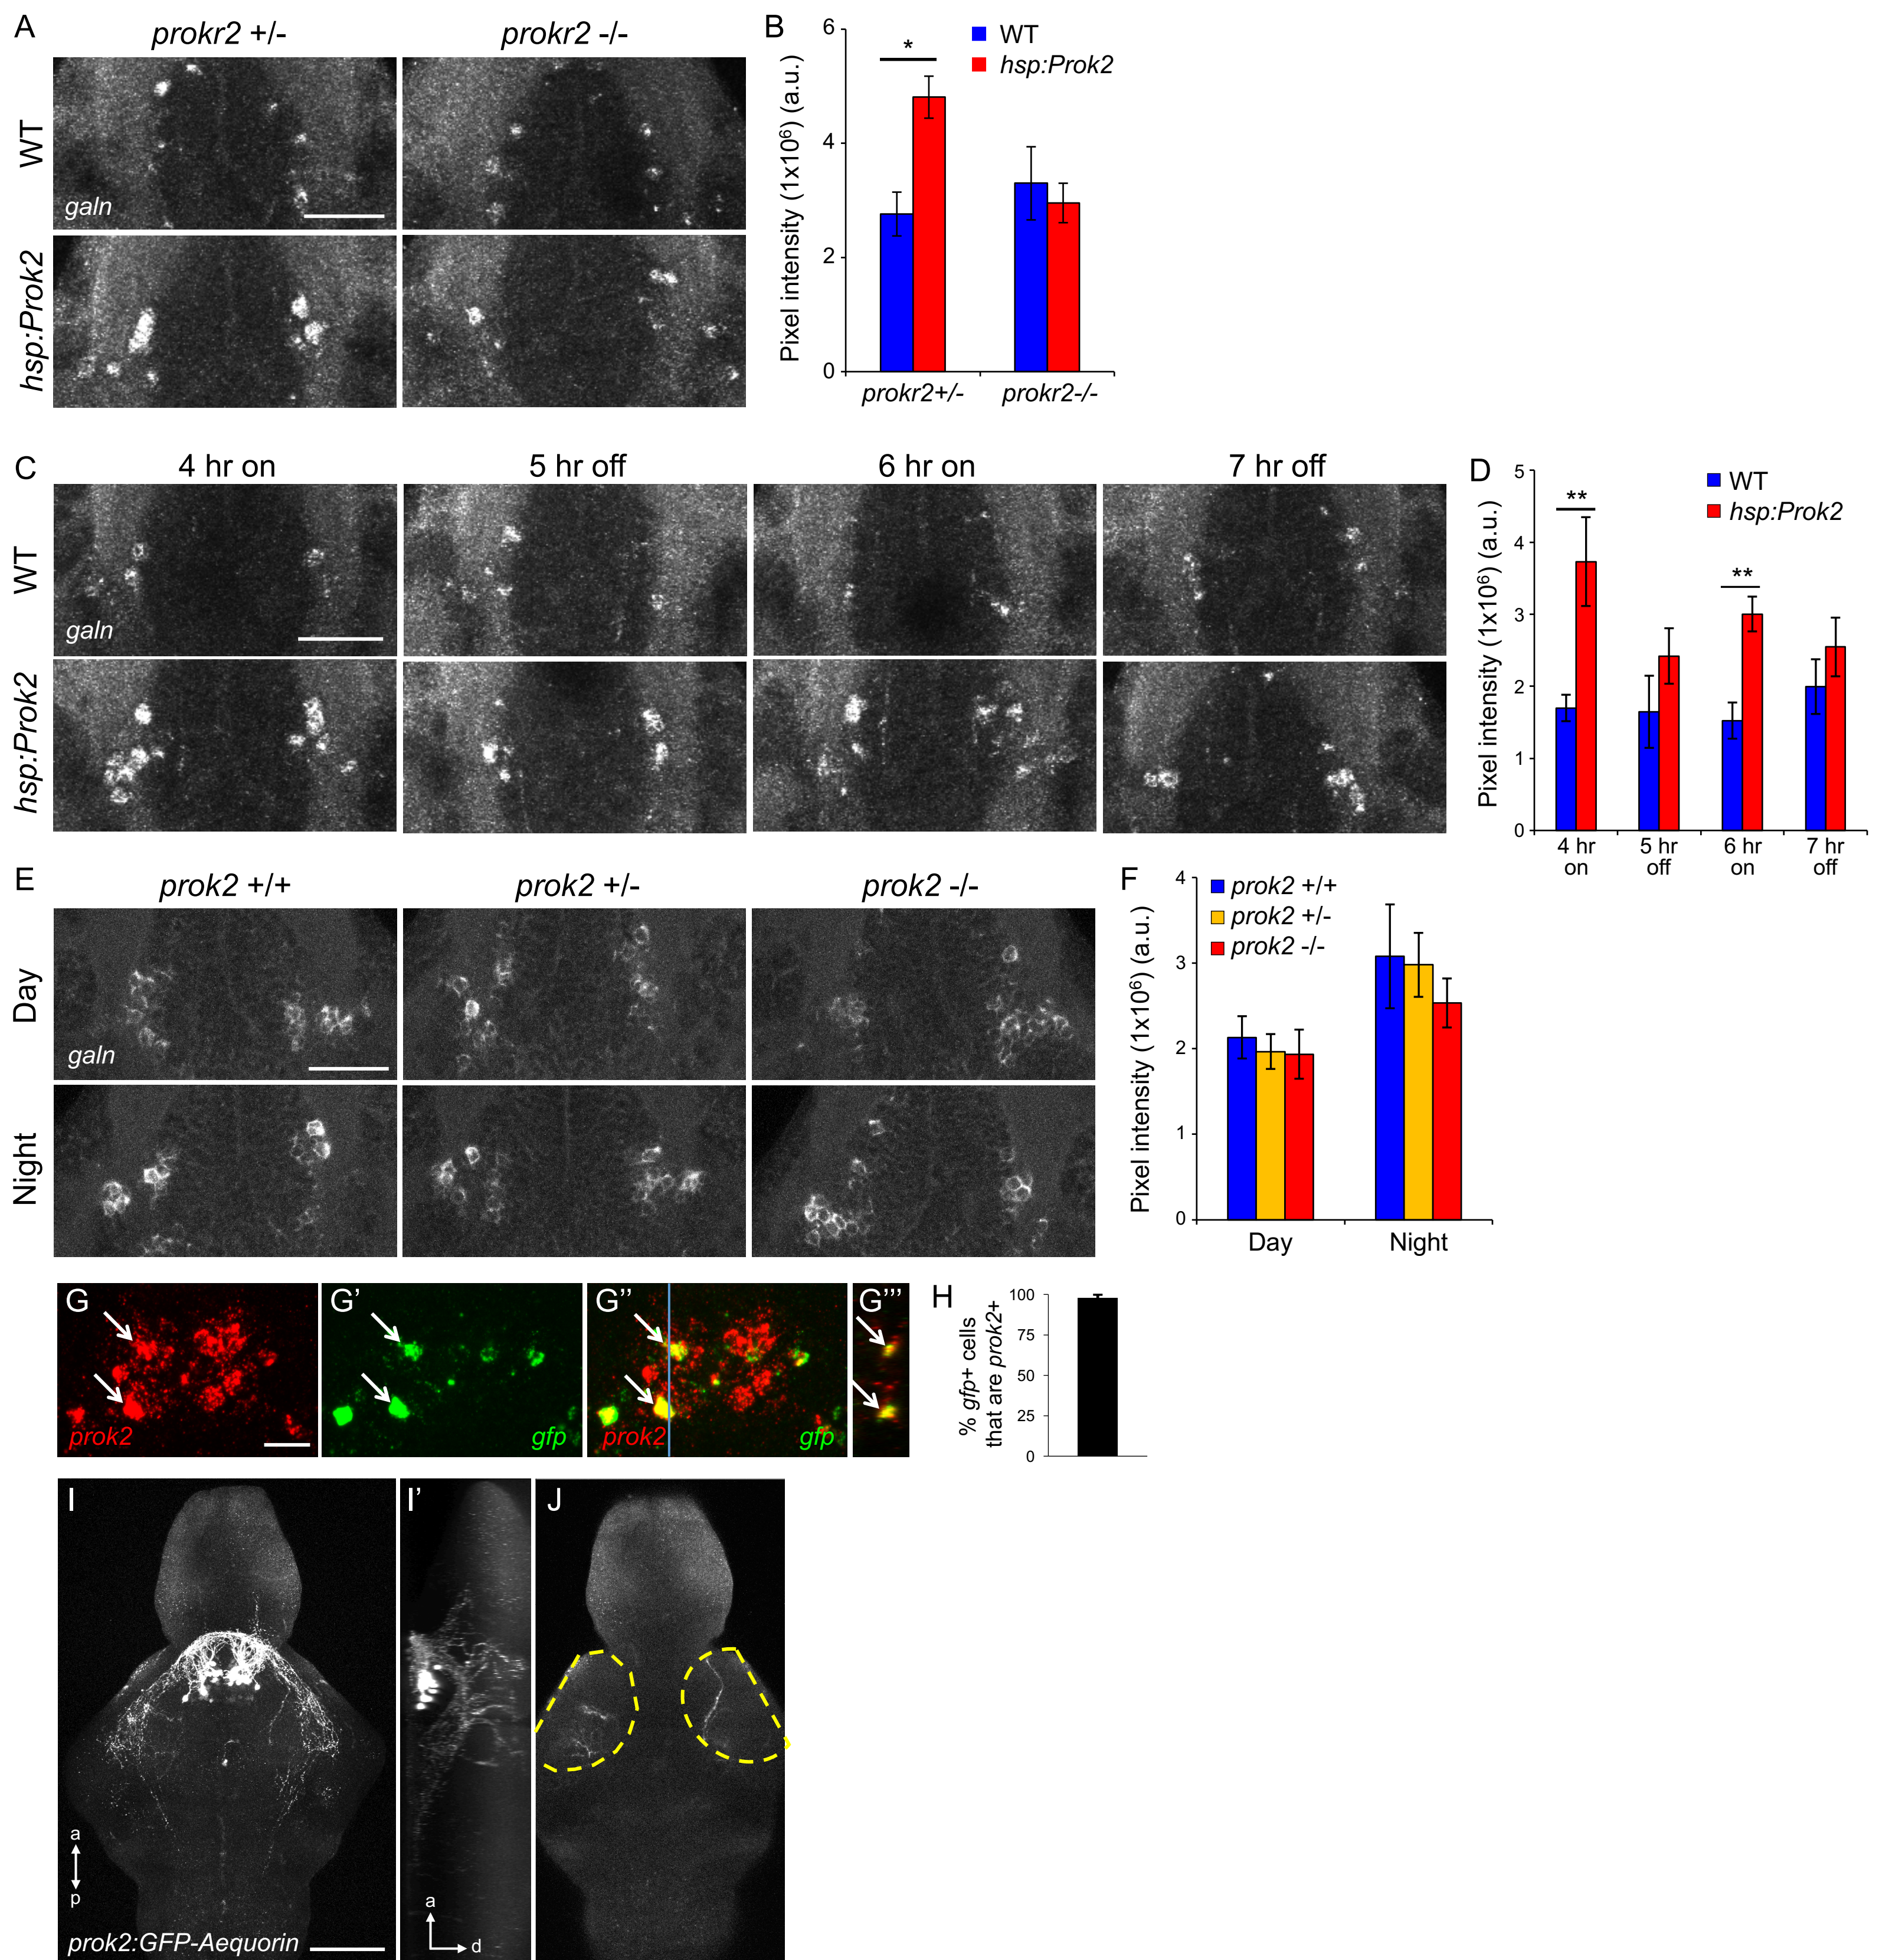



| <b>Table S1: Primers and genome editing target sequences</b> |                                                  |
|--------------------------------------------------------------|--------------------------------------------------|
| <b>Genotyping Primers</b>                                    |                                                  |
| <b>Primer Name</b>                                           | <b>Primer Sequence</b>                           |
| <i>hsp:Prok2</i> genotype F                                  | CGGGCCACCATGACAT                                 |
| <i>hsp:Prok2</i> genotype R                                  | GGTTTGTCCAAACTCATCAATGT                          |
| <i>prok2</i> mutant genotype F                               | CAAGTGGACACACCCGAACAC                            |
| <i>prok2</i> mutant genotype R                               | ATCCTGGAATGGAAATGGTG                             |
| <i>prokr1</i> mutant genotype F                              | GGCGTTGGTAATTGCGTATT                             |
| <i>prokr1</i> mutant genotype R                              | TATCAGCCACCAGCACTCTG                             |
| <i>prokr2</i> mutant genotype F                              | TGAGCGTAATGCTAATGGTCT                            |
| <i>prokr2</i> mutant genotype R                              | CCAGAGTGGCGATAAACACA                             |
| <i>galn</i> mutant genotype F                                | ATGTACTGTCCTCATGGCAAAG                           |
| <i>galn</i> mutant genotype R                                | AAATGTAGACCTGAGAGCAGC                            |
|                                                              |                                                  |
| <b>qPCR Primers</b>                                          |                                                  |
| <b>Primer Name</b>                                           | <b>Primer Sequence</b>                           |
| <i>prok2</i> qPCR F                                          | GGGGCATGTGAGAAGGACTCT                            |
| <i>prok2</i> qPCR R                                          | TCTTCTCCCTCCTGACCCATT                            |
| <i>prokr2</i> qPCR F                                         | GTGTCCACCAACGCCTTACT                             |
| <i>prokr2</i> qPCR R                                         | CTCCTGTGATCAAACAGTACGC                           |
| <i>per3</i> qPCR F                                           | CTCCAGCTTTCACAGCACTCA                            |
| <i>per3</i> qPCR R                                           | ACGCTTCTTCATCTCCTGCAC                            |
| <i>actin</i> qPCR F                                          | TCCTCCCTGGAGAAGAGCTATG                           |
| <i>actin</i> qPCR R                                          | TCCATACCCAGGAAGGAAGG                             |
|                                                              |                                                  |
| <b>Primers for Riboprobe Synthesis</b>                       |                                                  |
| <b>Primer Name</b>                                           | <b>Primer Sequence</b>                           |
| <i>prokr1</i> riboprobe F                                    | TGACTCGCAGTCACACAGTTC                            |
| <i>prokr1</i> riboprobe T7 R                                 | GAATTGTAATACGACTCACTATAGGGTCTTCCAAAGTATGGGTCGAA  |
| <i>prokr2</i> riboprobe F                                    | GCACAGAGAATGAGCGTCTG                             |
| <i>prokr2</i> riboprobe T7 R                                 | GAATTGTAATACGACTCACTATAGGGTCACTGAGGCTGAGGGTATAAA |
| <i>grp</i> riboprobe F                                       | CTATGTGCCTGGTGTGGAGA                             |
| <i>grp</i> riboprobe T7 R                                    | GAATTGTAATACGACTCACTATAGGGGCAGAAAGCCCAACAAGTTC   |
| <i>tgfa</i> riboprobe F                                      | CGCGTGCCTTCATCTTTATT                             |
| <i>tgfa</i> riboprobe T7 R                                   | GAATTGTAATACGACTCACTATAGGGTCCCCTGCCCATATTGAAC    |
|                                                              |                                                  |
|                                                              |                                                  |
| <b>TALEN and CRISPR/Cas9 DNA Target Sequences</b>            |                                                  |
| <b>Target Name</b>                                           | <b>Sequence</b>                                  |
| <i>prok2</i> TALEN L                                         | TGGCATGTGTTGTGCAGT                               |
| <i>prok2</i> TALEN R                                         | TGCACATTCGGAGACT                                 |
| <i>prokr1</i> TALEN L                                        | TACTTGAGGACTGTGTC                                |
| <i>prokr1</i> TALEN R                                        | TGGCCAGCAGAGCATT                                 |
| <i>prokr2</i> TALEN L                                        | TCTCACAGAAACAGCCAT                               |
| <i>prokr2</i> TALEN R                                        | TACAGCTGCCACGTGGCT                               |
| <i>galn</i> sgRNA                                            | CGGACTCACGAGGACCGAGGA                            |



## Supplemental Figure Legends

**Figure S1. *prok2* and *prokr2* expression levels do not oscillate in circadian manner, *prok2* expression level is not affected by light, and changes in light do not activate *prok2*-expressing neurons in larval zebrafish. Related to Figure 1.** (A, F) qRT-PCR analysis of *prok2* and *per3* (A), and *prokr2* and *per3* (F), mRNA is shown. Larvae were raised in 14:10 hour LD conditions and collected at the indicated times beginning at 6 dpf. Mean  $\pm$  SEM for triplicate biological samples normalized to *actin* at each time point is shown. *prok2* and *prokr2* expression does not change significantly over 24 hours, while *per3* expression oscillates with a 24-hour period. P values were calculated using one-way ANOVA. (B) 53  $\mu$ m thick confocal projections showing *prok2* FISH in larval zebrafish brains fixed at the indicated times. (C) Quantification of total *prok2* fluorescence pixel intensity is shown. *prok2* expression does not oscillate (peak:trough ratio=1.24,  $p=0.40$  by one-way ANOVA). Mean  $\pm$  SEM for five brains at each time point is shown. a.u. = arbitrary units. (D) A 53  $\mu$ m thick confocal projection showing *prok2* FISH in brains of larvae raised in LL or DD and fixed at 6 dpf. (E) Mean  $\pm$  SEM *prok2* FISH fluorescence intensity for 5 brains in each condition is shown, normalized to the LL condition. There is no significant difference in *prok2* mRNA level between the two conditions ( $p=0.40$  by two-tailed Student's *t* test). (G, H) Larvae were raised until 6 dpf in either DD or LL, then exposed to light or dark, respectively. Samples were fixed at the indicated times after the change in lighting condition. Control larvae were maintained in the original lighting condition. qRT-PCR was performed to measure the level of *prok2* (G) or *prokr2* (H) mRNA. Mean  $\pm$  SEM for triplicate biological samples normalized to *actin* at each time point is shown. Statistical significance was assessed by two-tailed Student's *t* test. (I-L) *prok2*-expressing neurons do not express *c-fos* in response to changes in lighting conditions. Larvae raised in DD (I, J) or LL (K, L) until 5 dpf were transferred to light (I, J) or dark (K, L) conditions, and fixed 15 or 30 minutes later. Double FISH using *prok2*- and *c-fos*-specific probes showed that *c-fos* is not expressed in *prok2*-expressing neurons in either case. Scale bars: 10  $\mu$ m.

**Figure S2. Dynamics of Prok2 overexpression, effects of induction of Prok2 overexpression during the day on sleep architecture, and induction of Prok2 overexpression at night produces a phenotype similar to that of daytime induction. Related to Figure 2.** (A-B) Time course of *prok2* mRNA and protein overexpression. Representative images of ISH using a *prok2*-specific probe (A) or IHC using a Prok2-specific antibody (B) in WT and *Tg(hsp:Prok2)* larvae. Larvae were heat shocked from 1-2 p.m. at 5 dpf and fixed at the indicated times after heat shock. Ectopic *prok2* mRNA is detected for at least 4 hours after heat shock. Ectopic Prok2 protein can be detected for at least 48 hours after heat shock. (C) Representative images of IHC using a Prok2-specific antibody on 5 dpf WT and *Tg(hsp:Hcrt)* larvae fixed 4 hours after heat shock. Overexpressed Hcrt protein (Prober et al., 2006) is not detected by the Prok2-specific antibody. Brains were genotyped by PCR after imaging. No HS, no heat shock. Scale bars: 100  $\mu$ m. (D-I) Following a daytime heat shock, increased daytime sleep due to Prok2 overexpression results from an increase in the number (D) and length (E) of sleep bouts, with a corresponding decrease in the length of wake bouts (F). Decreased sleep at night due to Prok2 overexpression results from a decrease in the length of sleep bouts (H). (J-O) Heat shock (gray bar in (J, M)) at night results in more activity at night (J, L) and less activity during the day (J, K) for *Tg(hsp:Prok2)* larvae compared to their WT siblings. Prok2 overexpression also results in less sleep at night (M, O) and more sleep during the day (M, N). These phenotypes were observed for up to 36 hours

following heat shock. Note that (K, L, N, O) exclude the first two hours after heat shock to allow larvae to recover from the heat shock. Both genotypes slept more during this recovery period. Data from one representative experiment (J, M), two experiments combined (K, L, N, O) and five experiments combined (D-I) are shown. (D-I, K, L, N, O) show mean  $\pm$  SEM. n = number of larvae. \* $p < 0.05$ , \*\* $p < 0.01$ , \*\*\* $p < 0.001$  by two-tailed Student's *t* test.

**Figure S3. Heat shock does not affect circadian rhythms, and the *Prok2* overexpression phenotype depends on lighting conditions and not on circadian rhythms. Related to Figures 3 and 4.** (A-C) qRT-PCR analysis of *per3* mRNA levels in larvae raised in LD (A), LL (B) or DD (C). *per3* levels oscillate in LD but not in LL or DD. At 6 dpf, larvae were (red) or were not (blue) heat shocked at 3 p.m. *per3* levels were not significantly affected by heat shock in any of the lighting conditions. Note the difference in y-axis scale for LD compared to LL and DD. Mean  $\pm$  SEM for triplicate biological samples normalized to *actin* at each time point is shown. (D-I) *Tg(hsp:Prok2)* larvae entrained in 14:10 hour LD conditions for 5 days and tested in LL show less locomotor activity (D-F) and more sleep (G-I) after heat shock (gray bar in (D, G)) compared to their WT siblings during both subjective day and subjective night. (J-O) *Tg(hsp:Prok2)* larvae entrained in 14:10 hour LD conditions for 5 days and tested in DD show more locomotor activity (J-L) and less sleep (M-O) after heat shock (gray bar in (J, M)) compared to their WT siblings during both subjective day and subjective night. Data from one representative experiment (D, G, J, M) and two experiments combined (E, F, H, I, K, L, N, O) are shown. Bar graphs show mean  $\pm$  SEM. n = number of larvae. \* $p < 0.05$ , \*\* $p < 0.01$ , \*\*\* $p < 0.001$  by one-way ANOVA (A-C) or two-tailed Student's *t* test (E, F, H, I, K, L, N, O).

**Figure S4. *Prok2* overexpression in adults increases locomotor activity in dark and suppresses locomotor activity in light. Related to Figures 2 and 4.** (A) Experimental protocol for (B-E). After a 12-hour heat shock at 37°C in the dark, *Tg(hsp:Prok2)* adult fish and their WT siblings were monitored during alternating 30 minute periods of light and dark. (B) *Prok2* overexpression increased the distance travelled at fast speeds in the dark (gray shading), and also decreased the distance travelled in the light, especially in the initial minutes after dark to light transitions. (C) Cumulative distribution plot (boxed region expanded in inset) of all distances travelled shows that both WT and *Tg(hsp:Prok2)* adults were more active in the light (WT light, green; hsp light, magenta) than in the dark (WT dark, blue; hsp dark, red). In the dark, *Tg(hsp:Prok2)* fish swam larger distances than WT, while in the light, *Tg(hsp:Prok2)* fish swam smaller distances than WT, similar to larval zebrafish. (D) Cumulative distribution of all swimming speeds in the light by *Tg(hsp:Prok2)* adult fish (light red, single fish; dark red, average of all fish) and their WT siblings (light blue, single fish; dark blue, average of all fish). *Tg(hsp:Prok2)* fish exhibited fewer bouts of high speed than their WT siblings ( $p = 0.002$ , Kolmogorov–Smirnov test). (E) Cumulative distribution of all swimming speeds in the dark. *Tg(hsp:Prok2)* adult fish exhibited more high speed bouts than their WT siblings ( $p = 3.5 \times 10^{-5}$ , Kolmogorov–Smirnov test). (F) Experimental protocol for (G-H). After a 12-hour heat shock at 37°C in the dark, *Tg(hsp:Prok2)* adult fish and their WT siblings were monitored during 11 hours of light. (G) *Prok2* overexpression reduced the distance traveled at fast speeds in light. (H) Cumulative distribution of all swimming speeds in light. *Tg(hsp:Prok2)* fish spent more time at lower speeds in light compared to their WT siblings ( $p = 1.7 \times 10^{-13}$ , Kolmogorov–Smirnov test).



**Figure S5. *prok2* and *prok* receptor mutants lack development defects associated with Kallmann syndrome, sleep architecture of *prok2* mutant larvae, and *prok2* mutant larvae exhibit normal circadian regulation of locomotor activity and sleep. Related to Figures 5 and 6.** (A) Representative genotyping images for *prok2*, *prokr1* and *prokr2* mutants. Band patterns for homozygous mutant, heterozygous mutant and homozygous WT are described in STAR Methods. (B) Images of representative WT, *prok2*<sup>-/-</sup>, and *prokr1*<sup>-/-</sup>; *prokr2*<sup>-/-</sup> 6-month old adult zebrafish. All fish are similar in size and morphology. (C) Representative images of ISH using probes specific for *gnrh2*, *gnrh3*, *th1* and *emx1* in 5 dpf WT, *prok2*<sup>-/-</sup>, and *prokr1*<sup>-/-</sup>; *prokr2*<sup>-/-</sup> larvae. Dashed boxes indicate olfactory region. (D) Representative images of ISH using probes specific for the hypothalamic neuropeptides *hert*, *qrfp* and *prok2* in *prok2*<sup>+/+</sup>, *prok2*<sup>+/-</sup> and *prok2*<sup>-/-</sup> larvae. Larvae of all genotypes show similar expression levels and patterns of each gene. There is no apparent nonsense-mediated decay of *prok2* mRNA in *prok2* mutants. Animals were genotyped by PCR after imaging. Scale bars: (B) 5 mm, (C) 100 μm, (D) 10 μm. (E-J) Sleep architecture of *prok2* mutant larvae. The increased activity and decreased sleep during days 6 and 7 of development in *prok2*<sup>-/-</sup> larvae is due to a decrease in the number of sleep bouts (E), with a trend towards longer waking bouts (I). (K-P) Larvae entrained in 14:10 hour LD conditions for 5 days and then monitored in DD maintain normal circadian rhythms of locomotor activity (K-M) and sleep (N-P), with no significant differences between *prok2*<sup>-/-</sup>, *prok2*<sup>+/-</sup> or *prok2*<sup>+/+</sup> siblings. Data from 5 experiments (E-J) and 2 experiments (K-P) combined are shown. Bar graphs show mean ± SEM. n = number of larvae. \*\*p<0.01 by one-way ANOVA, with post-hoc Dunnett's test compared to WT.

**Figure S6. *prok* receptor larval mutants lack sleep/wake phenotypes. Related to Figures 5 and 7.** (A, B) Amino acid sequence alignments of human (Hs), mouse (Mm), and zebrafish (Dr) Prokr1 (A) and Prokr2 (B) orthologs, and the sequences of two zebrafish Prokr1 mutant proteins (d7 and d22) and two zebrafish Prokr2 mutant proteins (d1 and d14) that were generated in this study. Predicted transmembrane (TM) domains are indicated by red lines. Both Prokr1 mutant proteins are truncated at the third TM domain. Both mutants exhibit similar phenotypes and mutant d7 was used for all reported experiments. Both Prokr2 mutant proteins are truncated before the first TM domain. Both mutants exhibit similar phenotypes and mutant d1 was used for all reported experiments. (C-H) *prokr1*<sup>-/-</sup>, *prokr1*<sup>+/-</sup> and *prokr1*<sup>+/+</sup> larvae exhibit similar amounts of locomotor activity (C-E) and sleep (F-H) during the day and night. (I-N). *prokr2*<sup>-/-</sup>, *prokr2*<sup>+/-</sup> and *prokr2*<sup>+/+</sup> larvae exhibit similar amounts of locomotor activity (I-K) and sleep (L-N) during the day and night. (O-T) *prokr1*<sup>+/-</sup>; *prokr2*<sup>+/-</sup>, *prokr1*<sup>-/-</sup>; *prokr2*<sup>+/-</sup>, *prokr1*<sup>+/-</sup>; *prokr2*<sup>-/-</sup> and *prokr1*<sup>-/-</sup>; *prokr2*<sup>-/-</sup> larvae exhibit similar amounts of locomotor activity (O-Q) and sleep (R-T) during the day and night. Data from one experiment (C-I, L) and two experiments (J, K, M-T) combined are shown. Bar graphs show mean ± SEM. n = number of larvae.

**Figure S7. The Prok2 overexpression phenotype requires *prokr2* but not *prokr1* or *dbh*. Related to Figure 7.** (A-F) Following heat shock at 5 dpf (gray bar in (A, D)), Prok2 overexpression-induced locomotor activity (A-C) and sleep (D-F) phenotypes are abolished in *prokr2*<sup>-/-</sup> larvae (yellow), but not in *prokr2*<sup>+/-</sup> larvae (red). Data from two experiments combined is shown. (G-L) Following heat shock at 5 dpf (gray bar in (G, J)), Prok2 overexpression-induced locomotor activity (G-I) and sleep (J-L) phenotypes are similar in *prokr1*<sup>-/-</sup> (yellow) and *prokr1*<sup>+/-</sup> larvae (red). Data from two experiments combined is shown. (M-R) *dbh*<sup>-/-</sup> larvae are less active (M-O) and sleep more (P-R) than their *dbh*<sup>+/-</sup> siblings during

the day and night. *Prok2* overexpression at 5 dpf (gray bar in (M, P)) decreased activity and increased sleep during the day (N, Q), and increased activity and decreased sleep at night (O, R), in both *dbh*<sup>+/−</sup> and *dbh*<sup>−/−</sup> larvae. Note the lack of difference between *Tg(hsp:Prok2);dbh*<sup>+/−</sup> and *Tg(hsp:Prok2);dbh*<sup>−/−</sup> larvae on day 5 post heat shock may be due to a floor effect. The magnitude of difference between *Tg(hsp:Prok2);dbh*<sup>+/−</sup> and *Tg(hsp:Prok2);dbh*<sup>−/−</sup> larvae on day 6 is similar to that between *dbh*<sup>+/−</sup> and *dbh*<sup>−/−</sup> larvae. Data from one representative experiment (M, P) and two experiments combined (N, O, Q, R) are shown. Bar graphs show mean ± SEM. n = number of larvae. \*p < 0.05, \*\*p < 0.01, \*\*\*p < 0.001, n.s. p > 0.05 by two-way ANOVA, with post-hoc Tukey's HSD test.

**Figure S8. Effects of *prok2* gain- and loss-of-function on hypothalamic *galn* expression, and *prok2*-expressing neuron fibers are present in the optic tectum. Related to Figure 8.** (A, B) *Prok2* overexpression increases hypothalamic *galn* expression in *prokr2*<sup>+/−</sup> larvae maintained in light for 4 hours after heat shock, but this effect is abolished in *prokr2*<sup>−/−</sup> larvae. (A) 28.8 μm thick confocal projections from representative brains showing hypothalamic *galn* FISH in *Tg(hsp:Prok2)* and non-transgenic *prokr2*<sup>+/−</sup> or *prokr2*<sup>−/−</sup> siblings. Animals were heat shocked at 6 dpf from 2-3 p.m. and then kept in light until fixation 4 hours later. (B) Mean ± SEM total fluorescence intensity of *galn* FISH. At least 7 brains were quantified for each condition. \*p < 0.05 by two-way ANOVA, with post-hoc Tukey's HSD test. (C, D) *Prok2* overexpression induces *galn* expression in a light-specific manner. (C) 28.8 μm thick confocal projections from representative brains showing hypothalamic *galn* FISH. *Tg(hsp:Prok2)* and non-transgenic siblings were heat shocked at 6 dpf from 2-3 p.m. and then kept in light until 7 p.m. (4 hr on). Lights were then turned off for 1 hour (5 hr off), on for 1 hour (6 hr on) and off for 1 hour (7 hr off), and samples were fixed at the end of each hour. On and off refer to samples that were exposed to light or dark during the hour before fixation. (D) Mean ± SEM total fluorescence intensity of *galn* FISH. *galn* mRNA levels were only significantly higher in *Prok2*-overexpressing larvae that were exposed to light during the hour before fixation. At least 9 brains were analyzed for each condition. \*\*p < 0.01 by two-tailed Student's *t* test. (E, F) *prok2* mutant larvae have normal hypothalamic *galn* expression levels. (E) 28.8 μm thick confocal projections from representative brains showing hypothalamic *galn* expression in *prok2*<sup>+/+</sup>, *prok2*<sup>+/−</sup> and *prok2*<sup>−/−</sup> larvae that were raised in LD until 6 dpf and fixed at 10 a.m. (day) or 12 a.m. (night). These time points are 1 hour after lights on and off, respectively. (F) Mean ± SEM total fluorescence intensity of *galn* FISH. *galn* mRNA levels are not significantly different among the genotypes during the day or night (p > 0.05 by two-way ANOVA). At least 7 brains were analyzed for each condition. (G-J) Fibers from *prok2*-expressing neurons are present in the optic tectum in larval zebrafish. (G) A 20 μm thick confocal projection showing the hypothalamus of a WT larva injected with a *prok2:GFP-Aequorin* transgene, fixed at 5 dpf and analyzed by double FISH using probes specific for *prok2* (red) and *gfp* (green). (G'') shows an orthogonal view of this image at the position of the blue line in (G'), indicating co-localization of signals from the two probes. Arrows indicate examples of cells that express both genes. (H) Quantification showing that 98% of *gfp-aequorin* expressing cells co-express *prok2*, indicating that the transgene is specifically expressed in *prok2*-expressing neurons. Mean ± SEM for 7 animals is shown. (I) A 130 μm thick confocal projection showing the brain of a WT larva injected with the *prok2:GFP-Aequorin* transgene, fixed at 5 dpf and labeled with a GFP-specific antibody. The GFP-labeled neurons project extensively within the hypothalamus. (I') shows an orthogonal view of this image, revealing dorsal projections to the optic tectum. (J) A 10 μm thick confocal section



showing GFP-labeled fibers in the optic tectum. Yellow dashed lines outline the left and right optic tectum. Scale bars: (A, C, E) 50  $\mu\text{m}$ , (G) 10  $\mu\text{m}$ , (I) 100  $\mu\text{m}$ . Anterior, posterior and dorsal axes are indicated.
